# Supplementary material for: Deep learning of left atrial structure and function provides link to atrial fibrillation risk
Source: PubMed Central journal article supplement (PMC11109224; doi:10.1038/s41467-024-48229-w), 2024-05-21
Supplement: 41467_2024_48229_MOESM1_ESM.pdf [file 41467_2024_48229_MOESM1_ESM.pdf]

# 1 Supplementary Note

|    |                                                                                          |           |
|----|------------------------------------------------------------------------------------------|-----------|
| 2  | <b>Supplementary Note</b>                                                                | <b>1</b>  |
| 3  | Supplementary Methods                                                                    | 3         |
| 4  | Comparison with left atrial biplane measurements                                         | 3         |
| 5  | GWAS sensitivity analysis: LVEDV-indexing                                                | 3         |
| 6  | GWAS sensitivity analysis: no exclusion for abnormal cardiac filling patterns            | 4         |
| 7  | GWAS sensitivity analysis: genetic diversity                                             | 4         |
| 8  | Polygenic score sensitivity analyses                                                     | 5         |
| 9  | Supplementary Results                                                                    | 6         |
| 10 | Semantic segmentation model quality assessment                                           | 6         |
| 11 | Segmentation and reconstruction quality control                                          | 7         |
| 12 | Comparison with left atrial biplane measurements                                         | 7         |
| 13 | Quality control for the deep learning model for abnormal cardiac filling patterns        | 8         |
| 14 | Relationship between cardiac filling patterns and left atrial volume                     | 9         |
| 15 | Atrial size was associated with AF, stroke, hypertension, and heart failure              | 9         |
| 16 | GWAS sensitivity analysis - LVEDV-indexing                                               | 11        |
| 17 | GWAS sensitivity analysis: no filtering for abnormal cardiac filling patterns            | 12        |
| 18 | GWAS sensitivity analysis: genetic diversity                                             | 12        |
| 19 | Supplementary Tables                                                                     | 14        |
| 20 | Supplementary Table 1: relationship between left atrial measurements and prevalent       |           |
| 21 | disease                                                                                  | 14        |
| 22 | Supplementary Table 2: relationship between left atrial measurements and incident        |           |
| 23 | disease                                                                                  | 15        |
| 24 | Supplementary Table 3: relationship between left atrial measurements and incident        |           |
| 25 | disease after adjustment for left ventricular features                                   | 16        |
| 26 | Supplementary Table 4: REML heritability and genetic correlation                         | 17        |
| 27 | Supplementary Table 5: Idsc heritability and intercept                                   | 18        |
| 28 | Supplementary Table 6: genetic correlation between left atrial measurements, atrial      |           |
| 29 | fibrillation, and stroke                                                                 | 19        |
| 30 | Supplementary Table 7: Relationship between atrial fibrillation polygenic score and left |           |
| 31 | atrial measurements                                                                      | 20        |
| 32 | Supplementary Table 8: relationship between left atrial polygenic scores and atrial      |           |
| 33 | fibrillation risk                                                                        | 21        |
| 34 | <b>Supplementary Figures</b>                                                             | <b>22</b> |
| 35 | Supplementary Figure 1 - Measurement distributions                                       | 22        |
| 36 | Supplementary Figure 2 - Normal and abnormal cardiac filling patterns                    | 23        |
| 37 | Supplementary Figure 3 - Sample flow diagram                                             | 25        |
| 38 | Supplementary Figure 4 - LV-adjusted left atrial phenotype Manhattan plots               | 26        |
| 39 | Supplementary Figure 5 - Mendelian randomization method comparison plot for LAmin        |           |

|    |                                                                                    |    |
|----|------------------------------------------------------------------------------------|----|
| 40 | vs atrial fibrillation                                                             | 27 |
| 41 | Supplementary Figure 6 - Pleiotropic associations for variants used in Mendelian   |    |
| 42 | randomization                                                                      | 29 |
| 43 | Supplementary Figure 7 - Mendelian randomization method comparison plot for LAmin  |    |
| 44 | vs atrial fibrillation after removing 3 pleiotropic variants                       | 30 |
| 45 | Supplementary Figure 8 - Mendelian randomization method comparison plot for atrial |    |
| 46 | fibrillation vs LAmin                                                              | 32 |
| 47 | Supplementary Figure 9 - Principal components of ancestry                          | 34 |
| 48 | Supplementary Figure 10 - Atrial volume with or without QC flags                   | 35 |
| 49 | Supplementary Figure 11 - Principal components of ancestry by inlier group         | 37 |
| 50 | Supplementary References                                                           | 38 |
| 51 | FinnGen Consortium                                                                 | 40 |
| 52 |                                                                                    |    |
| 53 |                                                                                    |    |

## 54 Supplementary Methods

### 55 Comparison with left atrial biplane measurements

56 The UK Biobank's cardiovascular MRI imaging protocol did not include a volumetric short-axis  
57 stack throughout the left atrium<sup>1</sup>, so left atrial measurements represent estimates of an  
58 unmeasured true left atrial volume. To assess quality, we compared the Poisson surface  
59 reconstruction approach with biplane measurements and tested each for association with  
60 prevalent atrial fibrillation. Using the R function *cor.test*, we correlated the Poisson surface  
61 reconstruction algorithm-based left atrial volume measurements with biplane-based volumes  
62 manually measured by experts<sup>2</sup>.

### 63 GWAS sensitivity analysis: LVEDV-indexing

64 A sensitivity analysis was conducted to assess the consequence of accounting for body size  
65 based on each individual's LVEDV (rather than BSA). In addition to functioning as a sensitivity  
66 analysis for that purpose, accounting for left ventricular volume could, in principle, help to  
67 identify loci whose effects have the opposite effect direction between atrium and ventricle.  
68 However, adjusting for heritable covariates in GWAS can also induce associations via collider  
69 bias<sup>3</sup>. Like the primary analyses, the LVEDV-indexed sensitivity analyses were conducted with  
70 BOLT-LMM with the same covariates and settings (**Online Methods**). To attempt to identify  
71 LVEDV-indexed associations that were likely attributable to the adjustment for LVEDV, we also  
72 conducted a GWAS of LVEDV in the same participants with the same settings, and then tested  
73 each of the LVEDV-indexed lead SNPs for independent association with LVEDV.

74 GWAS sensitivity analysis: no exclusion for abnormal cardiac filling  
75 patterns

76 A sensitivity analysis was conducted to assess the consequence of retaining participants  
77 identified by the deep learning model as having apparently abnormal cardiac filling. For this  
78 sensitivity analysis, only LAmin and BSA-indexed LAmin were evaluated. Like the primary  
79 analyses, BOLT-LMM was used for this analysis with the same covariates and settings (**Online**  
80 **Methods**).

81 GWAS sensitivity analysis: genetic diversity

82 The primary analyses permitted the inclusion of all participants with LA measurements,  
83 regardless of genetic identity (**Supplementary Figure 9**). As a sensitivity analysis, individuals  
84 were analyzed within genetic inlier groups instead of jointly. To accomplish this, first self-  
85 reported ethnicity—which is only informally correlated with genetic identity—was aggregated  
86 into European (British, Irish, and Other European), African (African,  
87 “Any\_other\_Black\_background”, “White\_and\_Black\_African”, and  
88 “White\_and\_Black\_Caribbean”), South Asian (Bangladeshi, Indian, Pakistani), and East Asian.  
89 Individuals with self-reported ancestry of “Any\_other\_mixed\_background”, “Mixed”,  
90 “White\_and\_Asian”, “Any\_other\_Asian\_background”, “Caribbean”, “Do\_not\_know”,  
91 “Other\_ethnic\_group”, or “Prefer\_not\_to\_answer” were not analyzed further. Then, for each  
92 group of participants, the R package *aberrant* was run on the centrally computed genetic  
93 principal components of ancestry using a 40 standard deviation window similar to the approach  
94 of Bycroft, *et al*<sup>4,5</sup>. Inliers for each genetic identity group were retained. Individuals that were not  
95 part of an inlier genetic identity group were excluded. The genetic identity inlier groups were  
96 termed EUR, AFR, SAS, and EAS.

97

98 The sample sizes for the AFR, SAS, and EAS subsets were all well below the threshold  
99 recommended for the use of BOLT-LMM (*"We recommend BOLT-LMM for analyses of human*  
100 *genetic data sets containing more than 5,000 samples"*, BOLT-LMM v2.4.1 User Manual  
101 [https://alkesgroup.broadinstitute.org/BOLT-LMM/BOLT-LMM\\_manual.html](https://alkesgroup.broadinstitute.org/BOLT-LMM/BOLT-LMM_manual.html) ). Therefore, for each  
102 of the four genetic inlier groups, a GWAS was conducted with REGENIE v2.2.4 which does not  
103 have the same limitation<sup>6</sup>. All models were adjusted for sex, age and age<sup>2</sup> at the time of MRI,  
104 the first 10 principal components of ancestry, the genotyping array, and the MRI scanner's  
105 unique identifier. Fixed-effect meta-analysis was then conducted with METAL (release version  
106 2020-05-05)<sup>7</sup>.

107

108 Two additional GWAS were conducted in BOLT-LMM v2.3.4 using the same covariates as the  
109 primary GWAS: one for the inlier EUR population, and another where an equivalent number of  
110 individuals were dropped at random from the original GWAS cohort (without regard for genetic  
111 inlier grouping) to yield a sample size that was the same as the inlier EUR population.

112

113 GWAS loci from the primary analysis were fetched from the meta-analysis, the EUR-specific  
114 GWAS, and the GWAS in which individuals were dropped at random.

## 115 Polygenic score sensitivity analyses

116 In addition to the primary LA polygenic scores produced with PRSs, an additional set of LA  
117 polygenic scores was created as a weighted allelic sum based on the lead variants for each  
118 trait. That is, for each tested participant, at each of the lead variant alleles, the number of effect  
119 alleles possessed by the participant was multiplied by the effect estimate; these were then  
120 summed for all alleles for each phenotype. They were tested for association with diseases in the  
121 same way as the PRSs scores.

## 122 Supplementary Results

### 123 Semantic segmentation model quality assessment

124 In a held-out test set of 20 manually annotated images from the two-chamber short axis view  
125 that were not used in training or validation, the average Dice coefficient was 0.89 (SD 0.06) for  
126 the left atrial blood pool. For 20 held-out images from the three-chamber view, the Dice score  
127 was 0.88 (SD 0.07). For 40 held-out images from the four-chamber view, the Dice score was  
128 0.94 (SD 0.03).

129

130 The short axis imaging sequence was not designed to capture the atria: the atrial short axis  
131 sequence was eliminated from the acquisition protocol to save acquisition time<sup>1</sup>. The left atrium  
132 was nevertheless recognizable in the basal-most segments of images obtained in the short axis  
133 view. In the short axis view, the average Dice score for the left atrium was 0.78 (SD 0.35) when  
134 weighted by the total number of pixels assigned to the left atrium by the cardiologist or the  
135 model, or 0.90 (SD 0.28) when considering images correctly identified by the model as having  
136 no left atrial pixels to have a Dice score of 1.

137

138 In the two-chamber view, the average Hausdorff distance was 6.7mm (SD 4.0mm). In the three-  
139 chamber view, the average Hausdorff distance was 8.8mm (SD 8.5mm). In the four-chamber  
140 view, the average Hausdorff distance was 5.2mm (SD 4.1mm). In the short-axis view, the  
141 average Hausdorff distance was 5.8mm (SD 4.2mm).

142

143 In the two chamber view, the average mean contour distance was 1.8mm (SD 0.6mm). In the  
144 three-chamber view, the average mean contour distance was 2.3mm (SD 2.2mm). In the four-  
145 chamber view, the average mean contour distance was 1.3mm (SD 0.90mm). In the short-axis

146 view, the average mean contour distance was 1.7mm (SD 1.7mm). The mean contour distance  
147 for the automated left atrial segmentation in each of these views was less than the in-plane pixel  
148 spacing of 1.83mm.

## 149 Segmentation and reconstruction quality control

150 QC-flagged samples (due to more than 1 connected component, frame-to-frame pixel changes  
151 greater than 5 standard deviations above the mean, the absence of left atrial pixels, or an  
152 abnormal number of CINE images as detailed in the **Online Methods**) were significantly more  
153 likely to fail to achieve a successful Poisson reconstruction (OR 1.4,  $P=1.3E-19$ ). Among the left  
154 atria that were successfully reconstructed, we tested whether the presence or absence of any of  
155 the QC flags was associated with volumetric measurements. However, the distribution was  
156 similar regardless of QC status (**Supplementary Figure 10**); the presence of QC flags was  
157 statistically non-significant for LAmin (0.020 SD greater with a flag,  $P=0.06$ ) and had a similarly  
158 small effect estimate for LAmax (0.036 SD greater with a flag,  $P=5E-04$ ). Therefore, all samples  
159 that were successfully reconstructed were retained for analysis.

## 160 Comparison with left atrial biplane measurements

161 We correlated the Poisson surface reconstruction algorithm-based left atrial volume  
162 measurements with biplane-based volumes manually measured by experts in 3,401  
163 participants<sup>2</sup>. When limiting the inputs into the Poisson surface reconstruction algorithm to only  
164 the two- and four-chamber long axis views ("Poisson biplane"), which are the two views used to  
165 calculate the biplane volume, the correlation improved for both LAmax (from  $r=0.814$ , 95% CI  
166 0.802 to 0.825,  $P=2.9E-804$  with the full reconstruction to  $r=0.887$ , 95% CI 0.880 to 0.894,  
167  $P=4.5E-1143$  with the Poisson biplane) and LAmin (from  $r=0.768$ , 95% CI 0.754 to 0.781,  
168  $P=1.1E-659$  to  $r=0.860$ , 95% CI 0.851 to 0.868,  $P=6.9E-994$ ). We interpreted these results as

169 supporting the notion that, when presented with the same input information, the modeling  
170 approach yields estimates that are similar to the standard biplane estimation.

171  
172 We then used logistic regression to recapitulate prior observations that individuals with pre-  
173 existing atrial fibrillation have larger atrial volumes<sup>8,9</sup>. In a subset of 39,148 participants, of  
174 whom 808 had atrial fibrillation, both the full Poisson reconstruction and the Poisson biplane  
175 reconstruction could be performed. Although the Poisson biplane better correlated with the  
176 manual measurements in the previous analysis, the full Poisson reconstruction was more  
177 strongly associated with prevalent atrial fibrillation (L<sub>Amax</sub> OR 1.72, P=1.3E-78 and L<sub>Amin</sub> OR  
178 1.86, P=1.0E-132) compared to the Poisson biplane model (L<sub>Amax</sub> OR 1.65, P=6.3E-66 and  
179 L<sub>Amin</sub> OR 1.80, P=2.8E-130).

180  
181 We interpreted these findings as indicating that (1) the Poisson-based measurements were well  
182 correlated with manual measurements, and (2) while full volumetric imaging stacks through the  
183 atria were not available to adjudicate correctness, the Poisson-based measurements that  
184 incorporated all available views (2ch, 3ch, 4ch, and SAX) were more strongly correlated with  
185 atrial fibrillation than the Poisson biplane measurements.

## 186 Quality control for the deep learning model for abnormal cardiac filling 187 patterns

188 Among 200 participants whose MRIs were manually reviewed (100 flagged as having abnormal  
189 cardiac filling patterns and 100 flagged as having normal cardiac filling patterns), manual review  
190 determined that 164 were normal and 36 were abnormal. The sensitivity of the model for  
191 identifying abnormal cardiac filling patterns was 100% (95% CI 90.3-100.0%) and the specificity  
192 was 61% (95% CI 53.1-68.5%). These findings suggested that the model may have over-



193 detected abnormal cardiac filling—leading to the exclusion of more participants than  
194 necessary—but had little evidence for false negatives.

## 195 Relationship between cardiac filling patterns and left atrial volume

196 Among the 40,558 participants with LA measurements whose filling patterns could be analyzed,  
197 we identified 1,013 participants whose patterns did not appear to be consistent with normal  
198 cardiac filling patterns. Of these, 376 (37%) had a pre-existing history of AF or atrial flutter. The  
199 same 376 participants represented 32% of all 1,189 participants with a history of AF or atrial  
200 flutter. The remaining 637 participants with abnormal cardiac filling patterns did not have a  
201 history of AF or flutter, representing only 1.6% of the 39,369 participants without such history.

202

203 Among participants with no history of AF or atrial flutter, those with an abnormal atrial cardiac  
204 filling patterns had significantly elevated LA volumes (**Figure 3**; N = 637; LA<sub>min</sub>: +1.3 standard  
205 deviations [SD] compared to the 38,732 with no AF history and normal cardiac filling patterns, P  
206 = 3.1E-321; LA<sub>max</sub>: +0.8 SD, P = 3.7E-103). The most extreme volumes were observed in  
207 participants with a history of AF or atrial flutter who also had an abnormal cardiac filling pattern  
208 (N = 376; LA<sub>min</sub>: +4.3 SD compared to those with no AF history and normal cardiac filling  
209 patterns, P = 1.6E-1937; LA<sub>max</sub>: +2.5 SD, P = 8.9E-623). The 813 participants with a history of  
210 AF and normal cardiac filling patterns had larger volumes than those with normal cardiac filling  
211 patterns and no AF history (LA<sub>min</sub>: +0.6 SD, P = 2.4E-101).

## 212 Atrial size was associated with AF, stroke, hypertension, and heart failure

213 After excluding participants with abnormal cardiac filling patterns, we conducted analyses in the  
214 remaining 39,545 participants. First, we confirmed previous reports of the relationship between  
215 prevalent diseases and atrial size and function. Compared to the 38,732 UK Biobank  
216 participants without a diagnosis of AF or atrial flutter prior to MRI, the 813 with a pre-existing

217 diagnosis had larger LA volumes (LAmin: +8.8mL, P = 9.2E-117; LAmax: +10.1mL, P = 1.5E-  
218 61) and a reduced LAEF (-4.6%, P = 9.7E-68). Participants with a history of heart failure,  
219 hypertension, or stroke also had elevated LA volumes (**Figure 3, left panel; Supplementary**  
220 **Table 1**).

221  
222 We then examined the relationship between LA measurements and incident cardiovascular  
223 diseases. We excluded an additional 1,114 participants with prevalent AF, heart failure, or  
224 stroke diagnosed prior to MRI, and 1,525 with missing height, weight, or body mass index (BMI)  
225 measurements at the time of MRI. Only a brief period of follow-up time of 2.2 +/- 1.5 years after  
226 the MRI assessment center visit was available for most participants. Nevertheless, participants  
227 with a larger LA had a greater risk of subsequently being diagnosed with AF (293 incident AF  
228 diagnoses; hazard ratio [HR] 1.73 per standard deviation [SD] increase in LAmin; 95% CI 1.60-  
229 1.88; P = 4.0E-39; **Figure 3, right panel**). The LAmin was also associated with an increased  
230 risk of incident ischemic stroke (98 cases; HR 1.32 per SD; 95% CI 1.11-1.57; P = 2.0E-03) and  
231 heart failure (125 cases; HR 1.69; 95% CI 1.48-1.92; P = 1.3E-15). The associations between  
232 other LA measurements and these diseases are detailed in **Supplementary Table 2**.

233  
234 We performed a sensitivity analysis that accounted for ECG features and left ventricular  
235 structure and function; this yielded a similar point estimate for LAmin as a marker of incident AF  
236 risk (HR 1.89 per SD; 95% CI 1.66-2.15; P = 4.5E-22). In this sensitivity analysis, LAmin  
237 remained a significant predictor of incident heart failure (HR 1.51 per SD; 95% CI 1.23-1.86; P =  
238 8.1E-05) but not of incident ischemic stroke (HR 1.10 per SD; 95% CI 0.84-1.43; P = 0.48;  
239 **Supplementary Table 3**).

## 240 GWAS sensitivity analysis - LVEDV-indexing

241 We are not aware of a general solution to the interpretation of GWAS signals that incorporate  
242 adjustment for heritable covariates. However, we observed the LVEDV-indexed lead SNPs to  
243 fall into three patterns: first, some SNP associations appeared to be driven largely by the  
244 LVEDV indexing rather than LA volume. As an example of this pattern, the LVEDV-indexed  
245 LAm<sub>ax</sub> association with *BAG3* ( $P=3.5E-10$ ) was comparable to that for the LVEDV association  
246 with *BAG3* alone ( $P=2.1E-10$ ), while the unadjusted LAm<sub>ax</sub> measurement was not associated  
247 ( $P > 1E-3$ ). At each of these loci, the effect direction in LVEDV was opposite to that in the  
248 respective LVEDV-indexed LA volume GWAS, which was expected. Practically, these signals  
249 appeared to be driven by the LVEDV values, with the LA measurements acting as noise.  
250 Second, some SNP associations appeared to be driven by the LAm<sub>ax</sub> association alone, with  
251 only minimal contribution from the LVEDV adjustment. For example, the LVEDV-indexed LAm<sub>ax</sub>  
252 association with *IRAK1BP1* ( $P=2.0E-8$ ) was similar to that for the LAm<sub>ax</sub> association ( $P=2.7E-$   
253  $11$ ), while the SNP was not associated with LVEDV ( $P > 1E-3$ ). Third, some SNP associations  
254 appeared to be driven by the interplay between LA volumes and the LVEDV adjustment. For  
255 example, the *NEDD4L* locus was associated with LVEDV-indexed LAm<sub>ax</sub> ( $P=4.7E-8$ ) despite  
256 not being strongly associated with either LVEDV or LAm<sub>ax</sub> alone ( $P > 1E-3$  for both).

257

258 For the LVEDV-indexed LA volumes, 11 loci reached genome-wide significance for LAm<sub>ax</sub>, 12  
259 for LAm<sub>in</sub>, and four for LASV. Of these, six of the LVEDV-indexed LAm<sub>ax</sub> loci had association  $P$   
260  $< 1E-3$  with LVEDV, as did nine of the LAm<sub>in</sub> loci and two of the LASV loci. Novel loci that were  
261 not associated at genome-wide significance in the unadjusted GWAS, and which were not  
262 associated with LVEDV at  $1E-3$  or stronger, included *BLK*, *ANKRD1*, *MYH7*, and *NEDD4L* for  
263 LAm<sub>ax</sub>; *CASQ2*, *DHX15*, *PROB1*, *UQCRB*, *ANKRD1*, and *MYH7* for LAm<sub>in</sub>, and *TNKS* and  
264 *HNRNPM* for LASV. Most of these loci were identified in the BSA-indexed GWAS as well.

265

## 266 GWAS sensitivity analysis: no filtering for abnormal cardiac filling patterns

267 Given the high sensitivity but low specificity of the model detecting abnormal cardiac filling  
268 patterns, sensitivity analysis retained the 615 participants who were not identified as having a  
269 normal cardiac filling pattern for GWAS of LAmin and BSA-indexed LAmin, yielding a total  
270 sample size of N=35,664 participants. (Because some participants are excluded by other criteria  
271 downstream of this filter in the primary GWAS, this number is smaller than the 1,013 noted in  
272 **Supplementary Figure 3**.) The lead SNPs are recorded in **Supplementary Data 11**.

273 Compared with the main analysis of 35,049 participants, some loci with marginal P-values were  
274 lost while others were gained; net, an additional two loci (10 in total) were identified for LAmin  
275 and an unchanged number of loci (13) were significant for BSA-indexed LAmin. For example,  
276 the association signal for *PITX2* variant rs2466455 for LAmin increased in significance from  
277  $P=4.6E-06$  to  $P=3.10E-08$  in this sensitivity analysis. Similarly the strongest associated variant  
278 near *PITX2* for BSA-indexed LAmin in this analysis (rs2723334,  $P=1.70E-10$ ) had stronger  
279 evidence for association than in the primary analysis ( $P=2.2E-08$ ).

## 280 GWAS sensitivity analysis: genetic diversity

281 Data from all participants were used for the primary GWAS, incorporating a diversity of genetic  
282 identities (**Supplementary Figure 9**). In a sensitivity analysis, only individuals with inlier genetic  
283 identities for one of four inlier groups were retained and analyzed separately (EUR, AFR, SAS,  
284 or EAS; **Supplementary Figure 11**). In this analysis, the largest inlier group was that for EUR,  
285 with 31,878 participants (9.9% smaller than the primary analysis). The second largest group  
286 was comprised of the 2,655 participants (7.6%) who were not genetic inliers for any group and  
287 were therefore not included in these sensitivity analyses. This was followed by SAS (N=284),  
288 AFR (N=133), and EAS (N=99), together comprising about 1.5% of the primary GWAS sample

289 size. GWAS were separately conducted for EUR, SAS, AFR, and EAS, and then meta-  
290 analyzed. Because of the loss of the participants who were included in the joint analysis but  
291 were not inliers for any genetic identity group, the multi-ancestry meta-analytic approach  
292 represented a loss of 7.6% of the total sample size compared to the primary analysis. These  
293 meta-analytic P-values were fetched for the lead variants from the primary analysis and are  
294 displayed in **Supplementary Data 2** as the “*P\_META*” column.

295

296 Two additional sensitivity analyses were performed using BOLT-LMM: a EUR-specific GWAS,  
297 and an analysis in which individuals were dropped at random to achieve the same sample size  
298 as the EUR-specific GWAS. The P-values for the primary analysis’s lead variants are also  
299 displayed in **Supplementary Data 2** with the “*P\_EUR*” and “*P\_RANDOMDROP*” columns,  
300 respectively.

301

302 The weakest association signal occurred for the BSA-indexed Lamin phenotype in the multi-  
303 ancestry meta-analysis at the *GOSR2* locus ( $P=2.5E-06$ ), which was an order of magnitude  
304 weaker than the evidence for the EUR subgroup without meta-analysis ( $P=2.0E-07$ ).

305 Nevertheless, across these sensitivity analyses, we largely observed minor variation in  
306 association signal without clear evidence for population stratification.

307

308

309

310

311 **Supplementary Tables**

312 **Supplementary Table 1: relationship between left atrial measurements and**  
 313 **prevalent disease**

| <b>Estimate</b> | <b>SE</b> | <b>T</b> | <b>P</b> | <b>Trait</b>       | <b>Condition</b> | <b>N tested</b> | <b>N with disease</b> |
|-----------------|-----------|----------|----------|--------------------|------------------|-----------------|-----------------------|
| 10.1            | 0.6       | 16.6     | 1.5E-61  | LAm <sub>max</sub> | Prevalent AF     | 39545           | 813                   |
| 1.9             | 1.4       | 1.3      | 1.9E-01  | LAm <sub>max</sub> | Prevalent Stroke | 39545           | 149                   |
| 8.7             | 1.2       | 7.3      | 3.4E-13  | LAm <sub>max</sub> | Prevalent CHF    | 39544           | 210                   |
| 4.6             | 0.2       | 24.0     | 1.5E-126 | LAm <sub>max</sub> | Prevalent HTN    | 39545           | 11852                 |
| 8.8             | 0.4       | 23.0     | 9.2E-117 | LAm <sub>min</sub> | Prevalent AF     | 39545           | 813                   |
| 2.4             | 0.9       | 2.7      | 6.7E-03  | LAm <sub>min</sub> | Prevalent Stroke | 39545           | 149                   |
| 7.7             | 0.7       | 10.3     | 7.3E-25  | LAm <sub>min</sub> | Prevalent CHF    | 39544           | 210                   |
| 2.5             | 0.1       | 20.7     | 2.4E-94  | LAm <sub>min</sub> | Prevalent HTN    | 39545           | 11852                 |
| -4.6            | 0.3       | -17.4    | 9.7E-68  | LAEF               | Prevalent AF     | 39545           | 813                   |
| -1.3            | 0.6       | -2.2     | 2.9E-02  | LAEF               | Prevalent Stroke | 39545           | 149                   |
| -3.8            | 0.5       | -7.3     | 3.0E-13  | LAEF               | Prevalent CHF    | 39544           | 210                   |
| -0.4            | 0.1       | -4.9     | 7.5E-07  | LAEF               | Prevalent HTN    | 39545           | 11852                 |

314  
 315 Association between left atrial measurements (dependent variables) and condition present at  
 316 the time of imaging (independent variables). Models were adjusted for age, sex and the  
 317 magnetic resonance imaging device serial number. Effect estimates and standard errors are  
 318 displayed in standard deviation units. P values are two-tailed. SE: standard error.

319

320 Supplementary Table 2: relationship between left atrial measurements and  
 321 incident disease

| Coef  | HR   | SE (Coef) | Z      | P       | Trait | Condition       | N tested | N with disease | Mean survival | SD survival |
|-------|------|-----------|--------|---------|-------|-----------------|----------|----------------|---------------|-------------|
| 0.48  | 1.61 | 0.05      | 9.00   | 2.2E-19 | LAmx  | Incident AF     | 36900    | 293            | 2.2           | 1.5         |
| 0.27  | 1.31 | 0.10      | 2.68   | 7.3E-03 | LAmx  | Incident Stroke | 36900    | 98             | 2.3           | 1.5         |
| 0.45  | 1.57 | 0.08      | 5.49   | 3.9E-08 | LAmx  | Incident CHF    | 36887    | 125            | 2.3           | 1.5         |
| 0.14  | 1.15 | 0.05      | 2.83   | 4.7E-03 | LAmx  | Incident HTN    | 26088    | 469            | 2.2           | 1.5         |
| 0.55  | 1.73 | 0.04      | 13.09  | 4.0E-39 | LAmn  | Incident AF     | 36900    | 293            | 2.2           | 1.5         |
| 0.28  | 1.32 | 0.09      | 3.09   | 2.0E-03 | LAmn  | Incident Stroke | 36900    | 98             | 2.3           | 1.5         |
| 0.52  | 1.69 | 0.07      | 8.00   | 1.3E-15 | LAmn  | Incident CHF    | 36887    | 125            | 2.3           | 1.5         |
| 0.20  | 1.22 | 0.05      | 4.31   | 1.6E-05 | LAmn  | Incident HTN    | 26088    | 469            | 2.2           | 1.5         |
| -0.63 | 0.53 | 0.06      | -10.86 | 1.9E-27 | LAEF  | Incident AF     | 36900    | 293            | 2.2           | 1.5         |
| -0.23 | 0.80 | 0.10      | -2.22  | 2.7E-02 | LAEF  | Incident Stroke | 36900    | 98             | 2.3           | 1.5         |
| -0.57 | 0.56 | 0.09      | -6.50  | 8.2E-11 | LAEF  | Incident CHF    | 36887    | 125            | 2.3           | 1.5         |
| -0.18 | 0.84 | 0.05      | -3.77  | 1.7E-04 | LAEF  | Incident HTN    | 26088    | 469            | 2.2           | 1.5         |

322 Association between left atrial measurements (independent variables) and incidence of  
 323 conditions subsequent to imaging (dependent variables) based on Cox proportional hazards  
 324 models. Models were adjusted for age, sex, the magnetic resonance imaging device serial  
 325 number, height, weight, and body mass index. P values are two-tailed. Effect estimates ("Coef")  
 326 are exponentiated to hazard ratios ("HR"). SE: standard error.  
 327  
 328

329 Supplementary Table 3: relationship between left atrial measurements and  
 330 incident disease after adjustment for left ventricular features

| Coef  | HR   | SE (Coef) | Z     | P       | Trait              | Condition       | N tested | N with disease | Mean survival | SD survival |
|-------|------|-----------|-------|---------|--------------------|-----------------|----------|----------------|---------------|-------------|
| 0.63  | 1.87 | 0.09      | 7.06  | 1.7E-12 | LAm <sub>max</sub> | Incident AF     | 36900    | 293            | 2.2           | 1.5         |
| -0.06 | 0.94 | 0.17      | -0.34 | 7.4E-01 | LAm <sub>max</sub> | Incident Stroke | 36900    | 98             | 2.3           | 1.5         |
| 0.36  | 1.44 | 0.14      | 2.57  | 1.0E-02 | LAm <sub>max</sub> | Incident CHF    | 36887    | 125            | 2.3           | 1.5         |
| 0.27  | 1.31 | 0.08      | 3.55  | 3.9E-04 | LAm <sub>max</sub> | Incident HTN    | 26088    | 469            | 2.2           | 1.5         |
| 0.63  | 1.89 | 0.07      | 9.66  | 4.5E-22 | LAm <sub>in</sub>  | Incident AF     | 36900    | 293            | 2.2           | 1.5         |
| 0.10  | 1.10 | 0.14      | 0.70  | 4.8E-01 | LAm <sub>in</sub>  | Incident Stroke | 36900    | 98             | 2.3           | 1.5         |
| 0.41  | 1.51 | 0.11      | 3.94  | 8.1E-05 | LAm <sub>in</sub>  | Incident CHF    | 36887    | 125            | 2.3           | 1.5         |
| 0.27  | 1.30 | 0.06      | 4.27  | 1.9E-05 | LAm <sub>in</sub>  | Incident HTN    | 26088    | 469            | 2.2           | 1.5         |
| -0.61 | 0.54 | 0.08      | -8.14 | 3.8E-16 | LA <sub>EF</sub>   | Incident AF     | 36900    | 293            | 2.2           | 1.5         |
| -0.16 | 0.85 | 0.13      | -1.31 | 1.9E-01 | LA <sub>EF</sub>   | Incident Stroke | 36900    | 98             | 2.3           | 1.5         |
| -0.42 | 0.66 | 0.11      | -3.75 | 1.8E-04 | LA <sub>EF</sub>   | Incident CHF    | 36887    | 125            | 2.3           | 1.5         |
| -0.17 | 0.84 | 0.06      | -2.89 | 3.9E-03 | LA <sub>EF</sub>   | Incident HTN    | 26088    | 469            | 2.2           | 1.5         |

331 Association between left atrial measurements (independent variables) and incidence of  
 332 conditions subsequent to imaging (dependent variables) based on Cox proportional hazards  
 333 models. Models were adjusted for age, sex, the magnetic resonance imaging device serial  
 334 number, height, weight, body mass index, heart rate, electrocardiographic features (P-wave  
 335 duration, QRS duration, PQ interval, QTc interval) and left ventricular features (end-systolic  
 336 volume, end-diastolic volume, and ejection fraction). P values are two-tailed. Effect estimates  
 337 (“Coef”) are exponentiated to hazard ratios (“HR”). SE: standard error.  
 338  
 339



Supplementary Table 4: REML heritability and genetic correlation

| Trait 1      | Trait 2      | Corr  | SE   | Meaning             |
|--------------|--------------|-------|------|---------------------|
| LAEF         |              | 0.14  | 0.02 | heritability        |
| LAmx         |              | 0.37  | 0.02 | heritability        |
| LAmx_indexed |              | 0.32  | 0.02 | heritability        |
| LAmn         |              | 0.33  | 0.02 | heritability        |
| LAmn_indexed |              | 0.27  | 0.02 | heritability        |
| LASV         |              | 0.28  | 0.02 | heritability        |
| LASV_indexed |              | 0.22  | 0.02 | heritability        |
| LAEF         | LAmx_indexed | -0.42 | 0.06 | genetic correlation |
| LAEF         | LAmn_indexed | -0.71 | 0.03 | genetic correlation |
| LAEF         | LASV         | -0.14 | 0.07 | genetic correlation |
| LAEF         | LASV_indexed | 0.00  | 0.07 | genetic correlation |
| LAmx         | LAEF         | -0.48 | 0.05 | genetic correlation |
| LAmx         | LAmx_indexed | 0.90  | 0.01 | genetic correlation |
| LAmx         | LAmn         | 0.95  | 0.01 | genetic correlation |
| LAmx         | LAmn_indexed | 0.88  | 0.01 | genetic correlation |
| LAmx         | LASV         | 0.93  | 0.01 | genetic correlation |
| LAmx         | LASV_indexed | 0.77  | 0.02 | genetic correlation |
| LAmx_indexed | LAmn_indexed | 0.94  | 0.01 | genetic correlation |
| LAmx_indexed | LASV_indexed | 0.91  | 0.01 | genetic correlation |
| LAmn         | LAEF         | -0.72 | 0.03 | genetic correlation |
| LAmn         | LAmx_indexed | 0.86  | 0.01 | genetic correlation |
| LAmn         | LAmn_indexed | 0.94  | 0.01 | genetic correlation |
| LAmn         | LASV         | 0.77  | 0.03 | genetic correlation |
| LAmn         | LASV_indexed | 0.62  | 0.04 | genetic correlation |
| LAmn_indexed | LASV_indexed | 0.72  | 0.04 | genetic correlation |
| LASV         | LAmx_indexed | 0.84  | 0.02 | genetic correlation |
| LASV         | LAmn_indexed | 0.70  | 0.04 | genetic correlation |
| LASV         | LASV_indexed | 0.87  | 0.01 | genetic correlation |

342 REML-based heritability of each trait and genetic correlation between trait pairs are depicted.

343 Corr represents the point estimate for each estimate. SE: standard error.

344

345 Supplementary Table 5: *ldsc* heritability and intercept

| Name                          | Observed scale h2 | Lambda GC | Mean $\chi^2$ | Intercept       | Ratio |
|-------------------------------|-------------------|-----------|---------------|-----------------|-------|
| invnorm_LAEF_poisson          | 0.1078 (0.0224)   | 1.0496    | 1.0649        | 0.9983 (0.0093) | < 0   |
| invnorm_LAmax_poisson         | 0.2351 (0.0274)   | 1.1301    | 1.1496        | 0.989 (0.0106)  | < 0   |
| invnorm_LAmin_poisson         | 0.2014 (0.0212)   | 1.1175    | 1.1315        | 0.9963 (0.0087) | < 0   |
| invnorm_LASV_poisson          | 0.1891 (0.0313)   | 1.0926    | 1.1085        | 0.9816 (0.0126) | < 0   |
| invnorm_LAmax_poisson_indexed | 0.2361 (0.0298)   | 1.1459    | 1.1409        | 0.9914 (0.0112) | < 0   |
| invnorm_LAmin_poisson_indexed | 0.2157 (0.0227)   | 1.0957    | 1.1317        | 0.9979 (0.009)  | < 0   |
| invnorm_LASV_poisson_indexed  | 0.193 (0.0339)    | 1.0957    | 1.0993        | 0.9812 (0.0133) | < 0   |

346 *Ldsc*-based heritability, lambda GC, mean  $\chi^2$ , and *ldsc* intercepts are depicted.

347

348

349 Supplementary Table 6: genetic correlation between left atrial  
 350 measurements, atrial fibrillation, and stroke

| LA Measurement             | Disease              | Genetic correlation | SE   | Z    | P       |
|----------------------------|----------------------|---------------------|------|------|---------|
| LAEF                       | AF                   | -0.16               | 0.08 | -2.0 | 5.1E-02 |
| LAEF                       | All stroke           | -0.14               | 0.10 | -1.3 | 1.8E-01 |
| LAEF                       | Cardioembolic stroke | -0.16               | 0.28 | -0.6 | 5.8E-01 |
| LAm <sub>max</sub>         | AF                   | 0.32                | 0.06 | 5.2  | 1.6E-07 |
| LAm <sub>max</sub>         | All stroke           | 0.17                | 0.07 | 2.4  | 1.8E-02 |
| LAm <sub>max</sub>         | Cardioembolic stroke | 0.13                | 0.24 | 0.6  | 5.7E-01 |
| LAm <sub>max_indexed</sub> | AF                   | 0.26                | 0.06 | 4.5  | 6.7E-06 |
| LAm <sub>max_indexed</sub> | All stroke           | 0.14                | 0.07 | 2.0  | 4.1E-02 |
| LAm <sub>max_indexed</sub> | Cardioembolic stroke | 0.11                | 0.19 | 0.6  | 5.8E-01 |
| LAm <sub>in</sub>          | AF                   | 0.37                | 0.06 | 6.4  | 2.0E-10 |
| LAm <sub>in</sub>          | All stroke           | 0.21                | 0.08 | 2.5  | 1.2E-02 |
| LAm <sub>in</sub>          | Cardioembolic stroke | 0.18                | 0.31 | 0.6  | 5.7E-01 |
| LAm <sub>in_indexed</sub>  | AF                   | 0.33                | 0.06 | 5.8  | 7.7E-09 |
| LAm <sub>in_indexed</sub>  | All stroke           | 0.19                | 0.08 | 2.4  | 1.7E-02 |
| LAm <sub>in_indexed</sub>  | Cardioembolic stroke | 0.15                | 0.27 | 0.6  | 5.8E-01 |
| LASV                       | AF                   | 0.18                | 0.06 | 3.1  | 2.0E-03 |
| LASV                       | All stroke           | 0.10                | 0.07 | 1.4  | 1.7E-01 |
| LASV                       | Cardioembolic stroke | 0.07                | 0.14 | 0.5  | 6.0E-01 |
| LASV <sub>indexed</sub>    | AF                   | 0.09                | 0.06 | 1.5  | 1.3E-01 |
| LASV <sub>indexed</sub>    | All stroke           | 0.04                | 0.06 | 0.7  | 4.8E-01 |
| LASV <sub>indexed</sub>    | Cardioembolic stroke | 0.02                | 0.06 | 0.4  | 6.7E-01 |

351  
 352 LA: left atrium. SE: standard error. P values are two-tailed.  
 353

354 Supplementary Table 7: Relationship between atrial fibrillation polygenic  
 355 score and left atrial measurements  
 356

| Estimate | Low    | High   | SE     | T     | P       | Score  | Trait                      | N     |
|----------|--------|--------|--------|-------|---------|--------|----------------------------|-------|
| 0.039    | 0.029  | 0.048  | 0.0049 | 7.93  | 2.3E-15 | af.prs | LAm <sub>max</sub>         | 35049 |
| 0.042    | 0.032  | 0.053  | 0.0054 | 7.85  | 4.3E-15 | af.prs | LAm <sub>max_indexed</sub> | 33893 |
| 0.052    | 0.042  | 0.061  | 0.0049 | 10.49 | 1.1E-25 | af.prs | LAm <sub>in</sub>          | 35049 |
| 0.055    | 0.045  | 0.065  | 0.0053 | 10.43 | 2.1E-25 | af.prs | LAm <sub>in_indexed</sub>  | 33893 |
| -0.047   | -0.057 | -0.037 | 0.0052 | -9.03 | 1.8E-19 | af.prs | LA <sub>EF</sub>           | 35049 |
| 0.013    | 0.003  | 0.023  | 0.0050 | 2.61  | 9.1E-03 | af.prs | LA <sub>SV</sub>           | 35049 |
| 0.012    | 0.001  | 0.023  | 0.0054 | 2.20  | 2.8E-02 | af.prs | LA <sub>SV_indexed</sub>   | 33893 |

357  
 358 Low and High represent the lower and upper bounds of the 95% confidence interval for the  
 359 Estimate. SE: standard error. Units are in standard deviations of the left atrial measurements  
 360 per standard deviation of the atrial fibrillation polygenic score. P values are two-tailed from a  
 361 linear model.  
 362

363 Supplementary Table 8: relationship between left atrial polygenic scores  
 364 and atrial fibrillation risk  
 365  
 366

| <b>N</b> | <b>Disease</b>                 | <b>Score</b>          | <b>N with Disease</b> | <b>Beta</b> | <b>HR</b> | <b>SE</b> | <b>P</b> |
|----------|--------------------------------|-----------------------|-----------------------|-------------|-----------|-----------|----------|
| 417881   | Atrial fibrillation or flutter | invnorm_LAmax         | 21147                 | 0.057       | 1.06      | 0.007     | 2.5E-16  |
| 417881   | Atrial fibrillation or flutter | invnorm_LAmax_indexed | 21147                 | 0.066       | 1.07      | 0.007     | 1.4E-21  |
| 417881   | Atrial fibrillation or flutter | invnorm_LAmin         | 21147                 | 0.078       | 1.08      | 0.007     | 1.7E-29  |
| 417881   | Atrial fibrillation or flutter | invnorm_LAmin_indexed | 21147                 | 0.082       | 1.09      | 0.007     | 7.4E-32  |
| 417881   | Atrial fibrillation or flutter | invnorm_LASV          | 21147                 | 0.026       | 1.03      | 0.007     | 2.6E-04  |
| 417881   | Atrial fibrillation or flutter | invnorm_LAEF          | 21147                 | -0.059      | 0.94      | 0.007     | 8.3E-18  |

367  
 368 HR: hazard ratio in atrial fibrillation risk per standard deviation in the left atrial polygenic score.  
 369 SE: standard error. P values are two-tailed from a Cox model.  
 370  
 371

372 Supplementary Figures

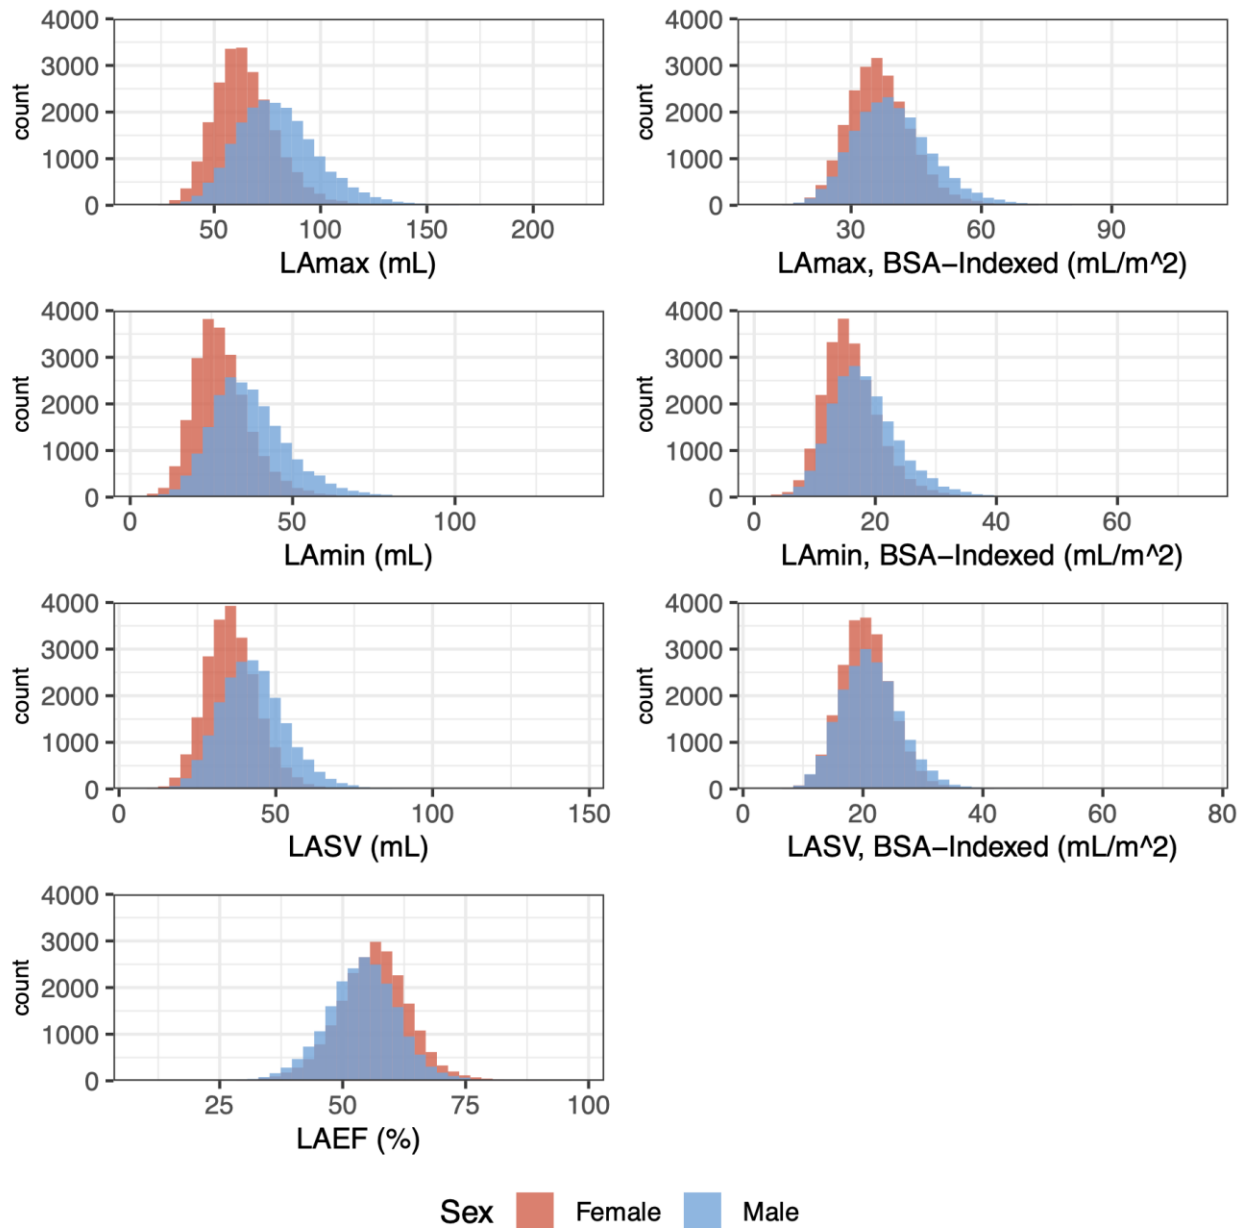

373

374 Supplementary Figure 1 - Measurement distributions

375 Trait distributions for the left atrial phenotypes without adjustment and after adjustment for body  
376 surface area (BSA). LAEF is dimensionless and is therefore not adjusted for BSA.

### Normal pattern

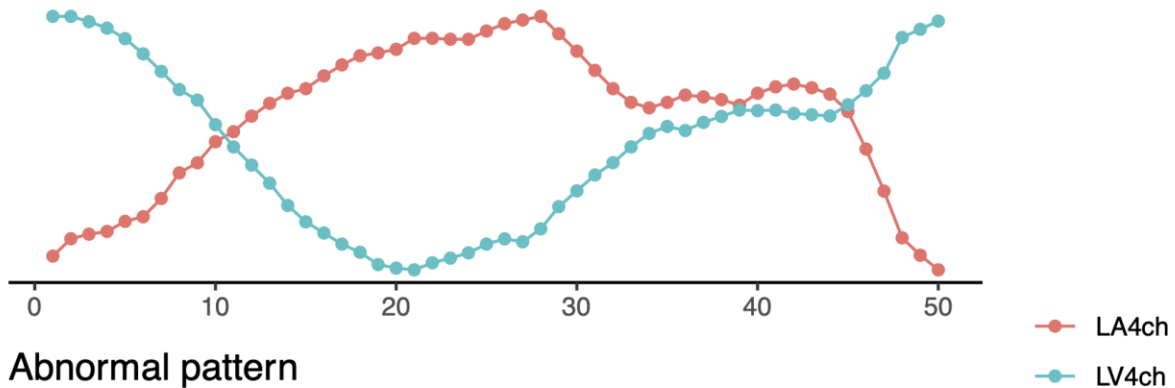

### Abnormal pattern

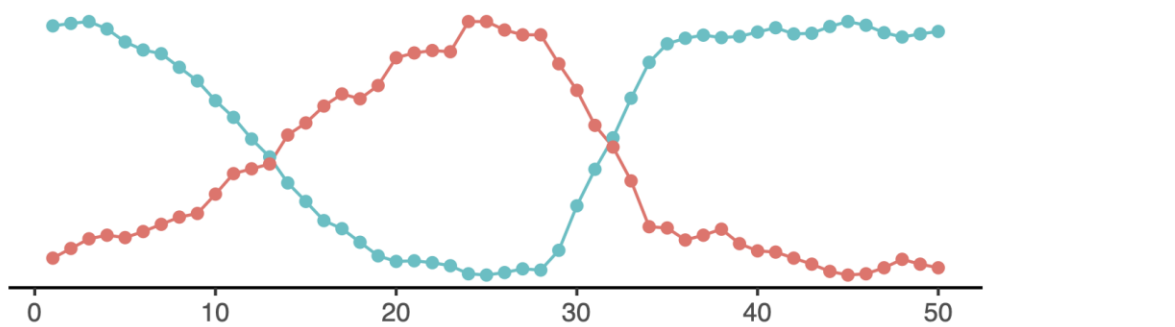

377

### 378 Supplementary Figure 2 - Normal and abnormal cardiac filling patterns

379 Curves depicting the data used in the abnormal filling pattern detector are displayed for one  
380 individual with a normal pattern (**top panel**) and one with an abnormal pattern (**bottom panel**).

381 For visual simplicity, only the left atrial and left ventricular curves from the four-chamber view  
382 are displayed. Each datum represents the cross-sectional area at each time point for each

383 chamber. Values are scaled between 0 and 1 (y-axis) on a per-chamber basis so that the  
384 maximum is always 1 and the minimum is always 0 for each chamber independently, which is  
385 consistent with how the data are transformed prior to being input into the deep learning model.

386 Values are visualized at the 50 timepoints during image acquisition (x-axis). Both panels begin  
387 at ventricular end-diastole. The example in the **top panel** reveals a triphasic pattern: ventricular  
388 systole continues until timepoint 20, passive ventricular filling until timepoint 45, and then an  
389 active ventricular filling phase due to atrial systole from 45-50. The example in the **bottom**



390 **panel** reveals a biphasic pattern: there is only ventricular systole until timepoint ~25 and  
391 ventricular diastole for the remainder of the cycle, with the atrium passively filling and emptying  
392 in parallel.  
393

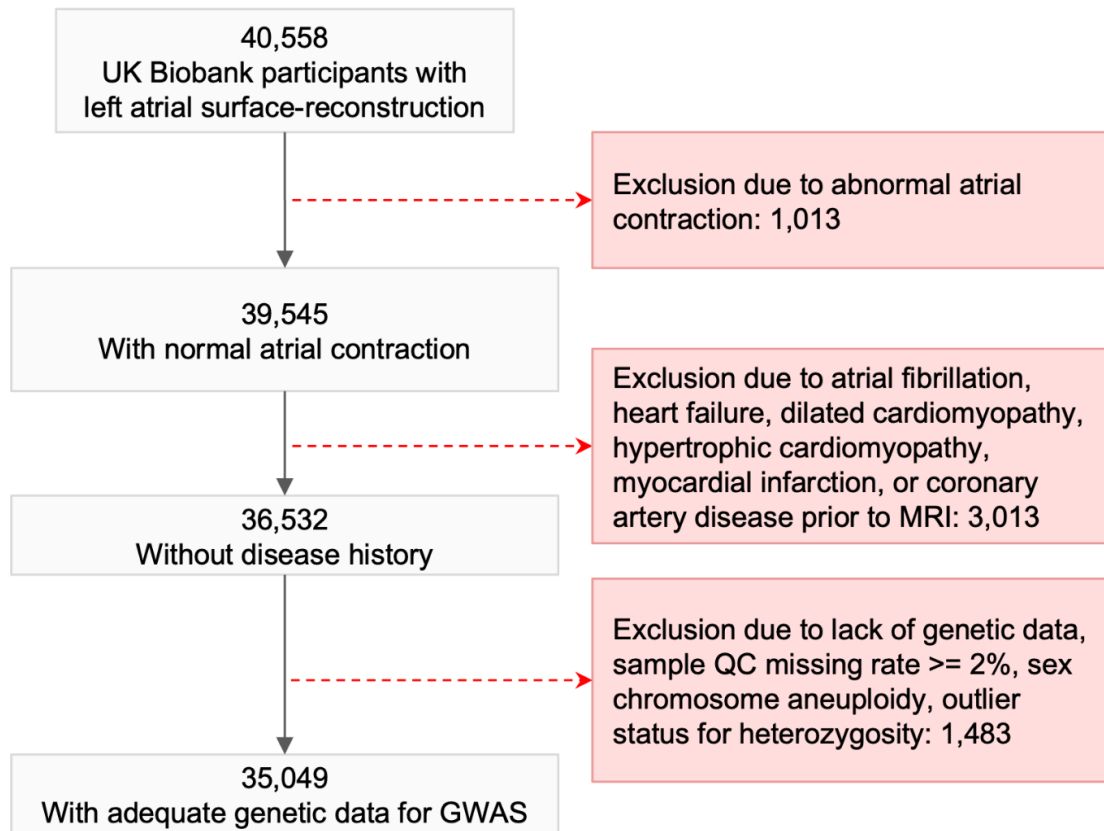

394

395 Supplementary Figure 3 - Sample flow diagram

396 Sample exclusion steps between surface reconstruction and the creation of the GWAS cohort  
397 are described.

398

399

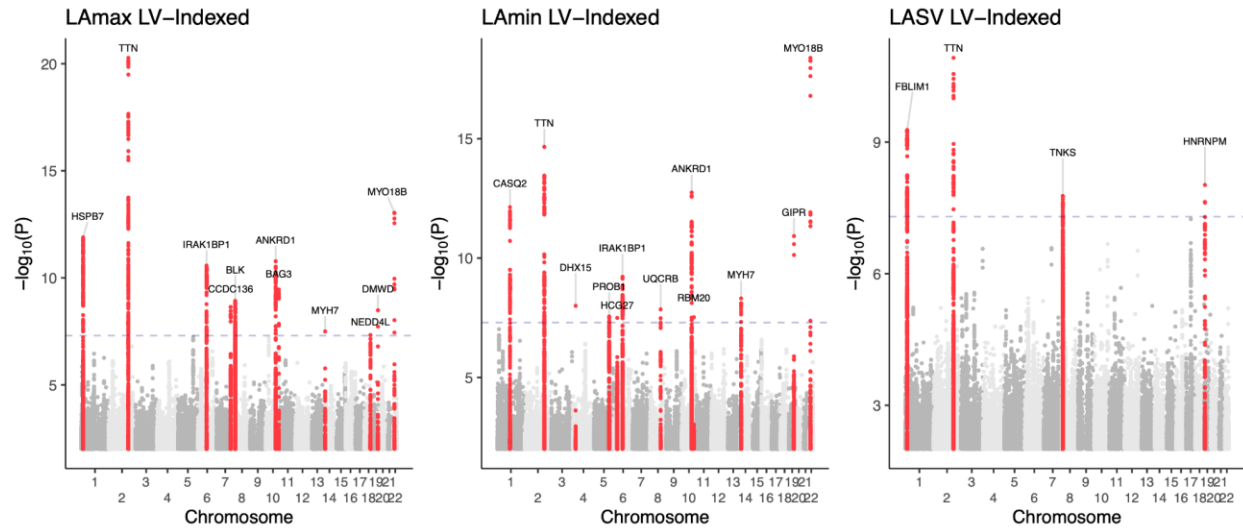

400

401 Supplementary Figure 4 - LV-adjusted left atrial phenotype Manhattan plots

402 Manhattan plots for LA measurements divided by LVEDV. X-axis: chromosomal position. Y-axis:

403  $-\log_{10}(P\text{-value})$ . Nearest gene names are annotated near significant loci, which are colored in

404 red.

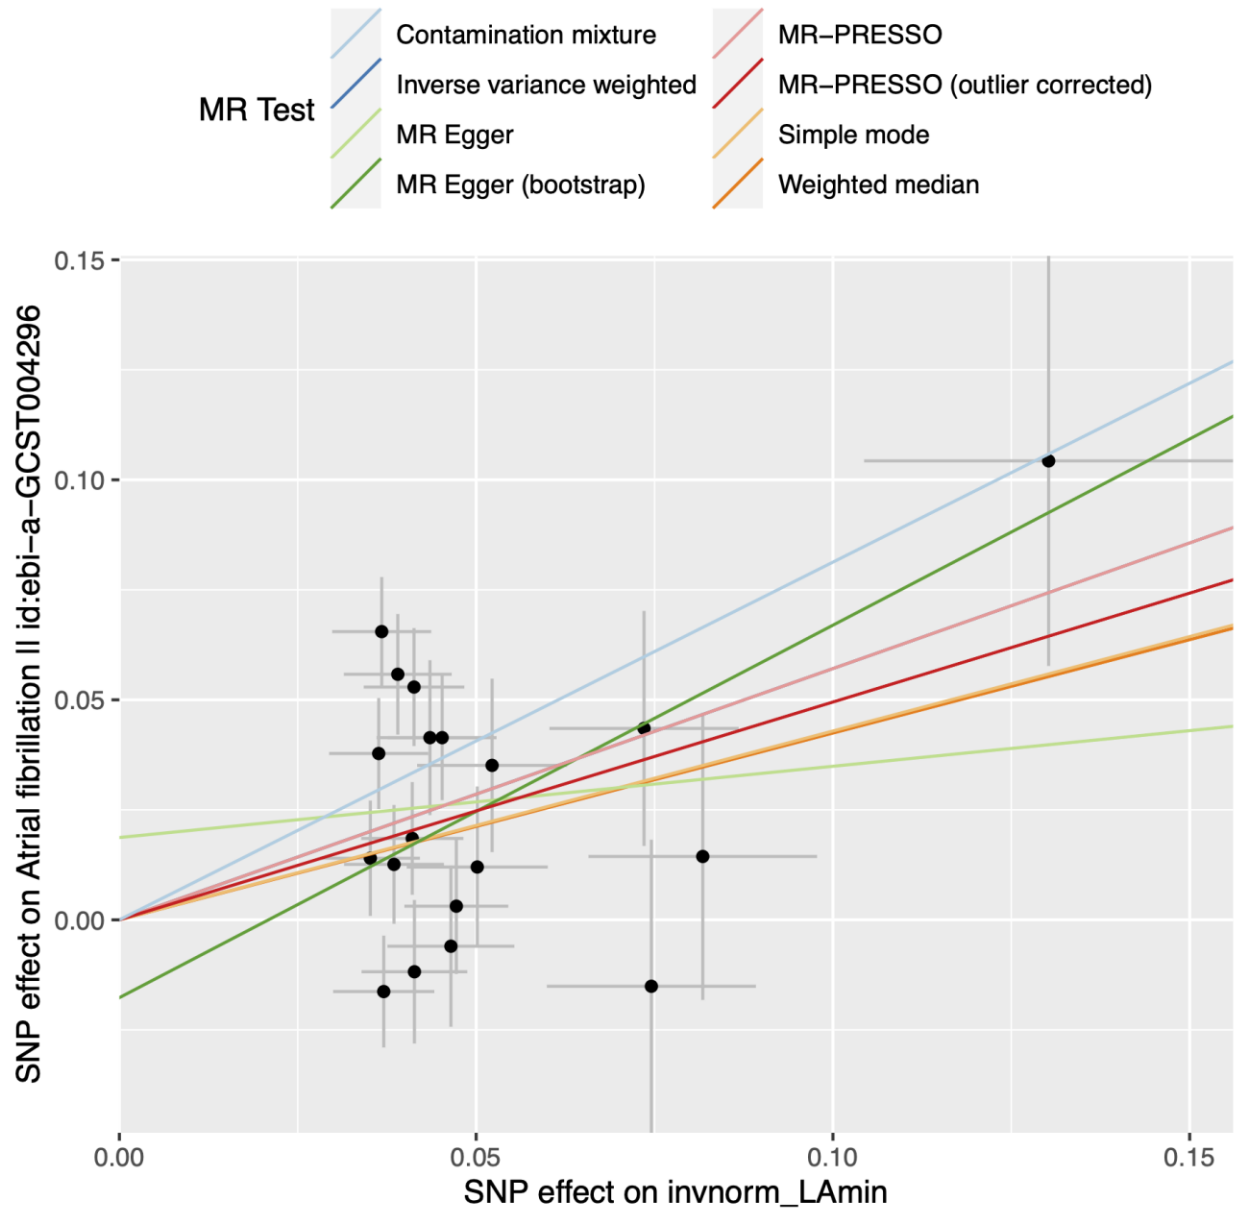

405

406 Supplementary Figure 5 - Mendelian randomization method comparison

407 plot for LAmin vs atrial fibrillation

408 SNP effects on the exposure (X-axis) are plotted against SNP effects on the outcome (Y-axis).

409 Here, the X-axis effect size comes from the LAmin volume GWAS in this manuscript, while the

410 Y-axis effect size comes from the Christophersen, et al, 2017 atrial fibrillation GWAS<sup>10</sup>. Points  
411 represent the mean effect estimates, with 95% confidence intervals for the mean.

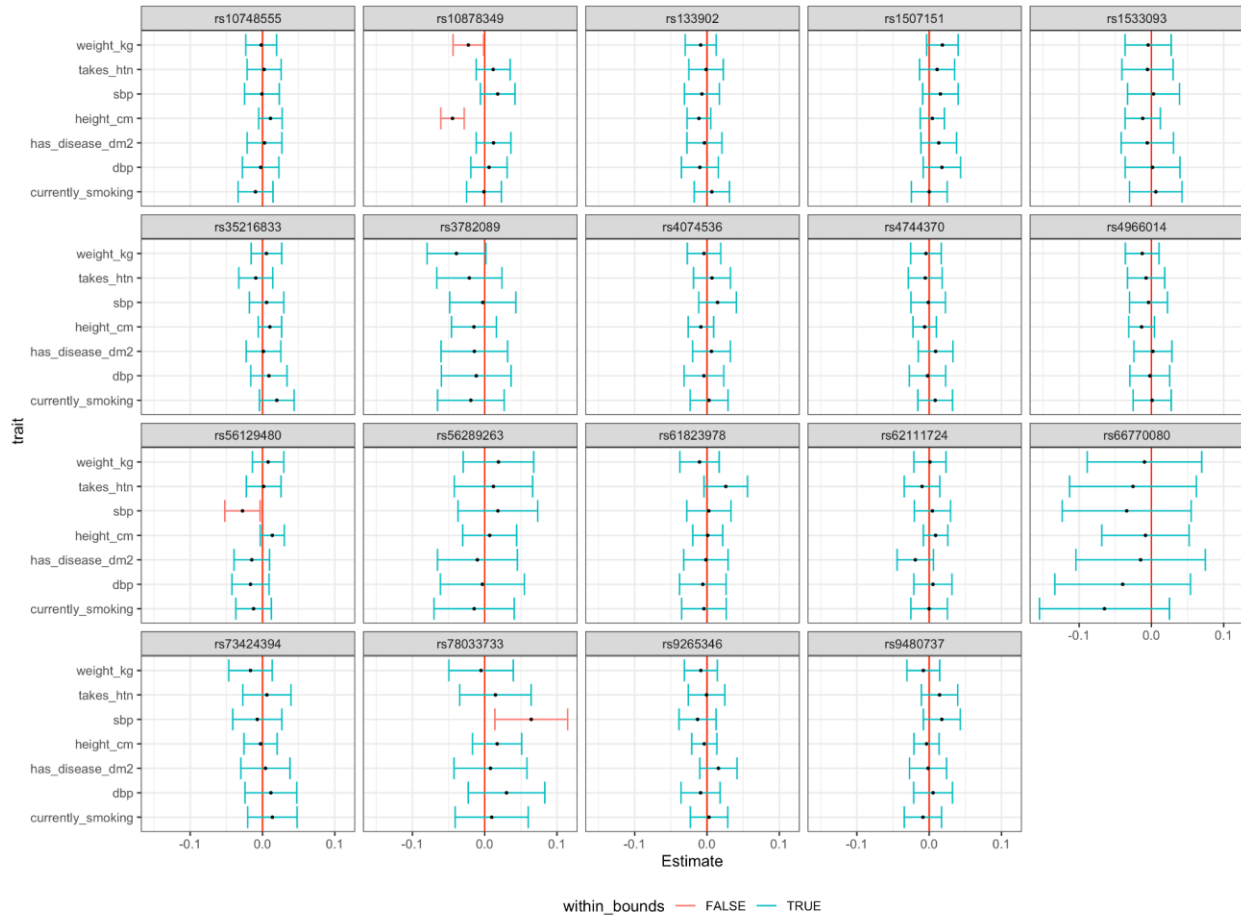

412

413 Supplementary Figure 6 - Pleiotropic associations for variants used in  
 414 Mendelian randomization

415 Each of the 19 SNPs from the LAmin Mendelian randomization analysis was tested for  
 416 association with seven phenotypes previously identified as atrial fibrillation risk factors in  
 417 CHARGE-AF. For each SNP, this figure displays the mean point estimate of the effect of 1 unit  
 418 change in the dosage of the non-reference allele on each trait, along with 95% confidence  
 419 intervals for the mean. Traits where the association with the SNP achieves Bonferroni  
 420 significance are shown in red. Three of the 19 SNPs were identified to have a significant  
 421 association with at least one putative confounding factor (rs10878349 near *IRAK3*, rs56129480  
 422 near *SP3*, and rs78033733 near *MYL4*).

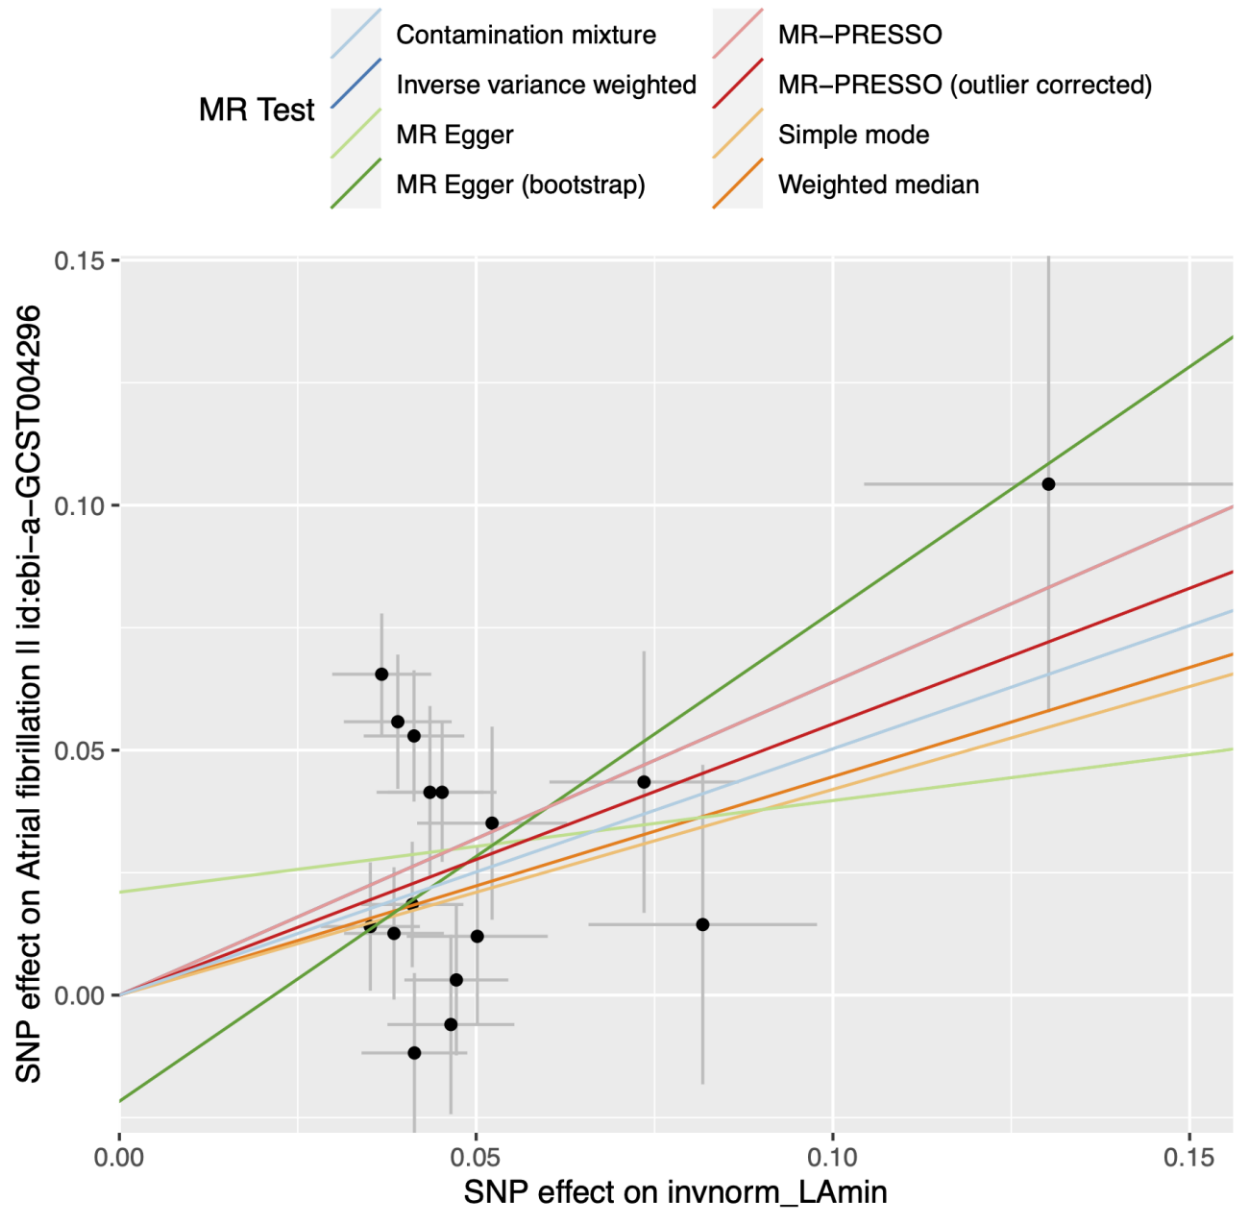

423

424 Supplementary Figure 7 - Mendelian randomization method comparison

425 plot for Lamin vs atrial fibrillation after removing 3 pleiotropic variants

426 SNP effects on the exposure (X-axis) are plotted against SNP effects on the outcome (Y-axis).

427 Here, the X-axis effect size comes from the Lamin volume GWAS in this manuscript, while the

428 Y-axis effect size comes from the Christophersen, et al, 2017 atrial fibrillation GWAS<sup>10</sup>. Points  
429 represent the mean effect estimates, with 95% confidence intervals for the mean.  
430



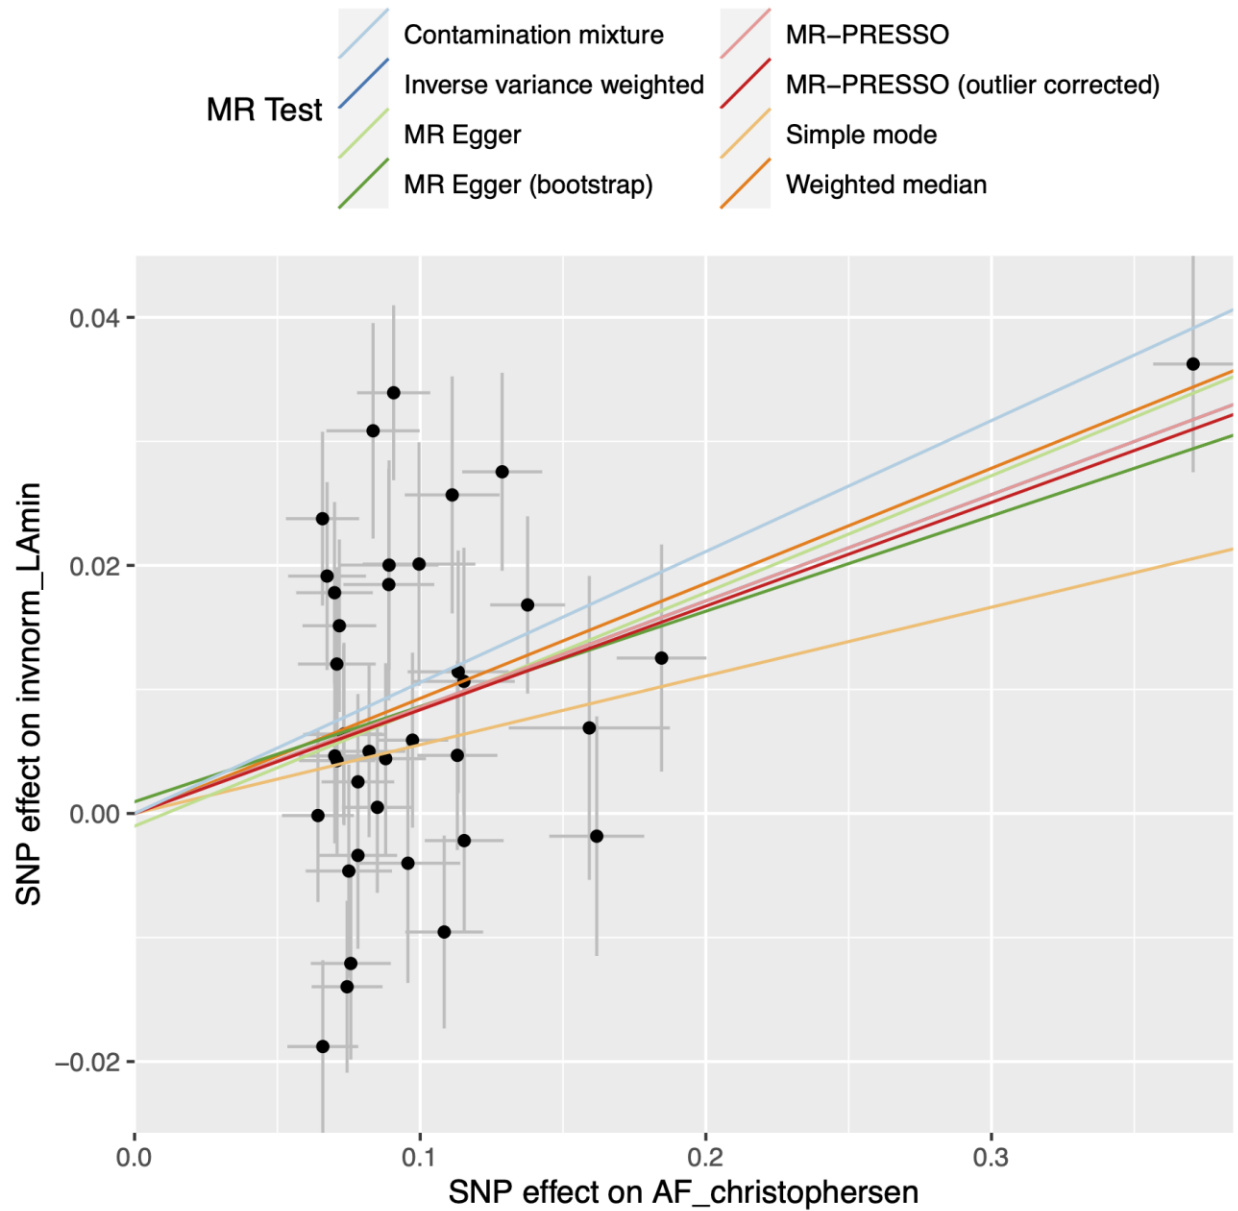

431

432 Supplementary Figure 8 - Mendelian randomization method comparison

433 plot for atrial fibrillation vs LAmin

434 SNP effects on the exposure (X-axis) are plotted against SNP effects on the outcome (Y-axis).

435 Here, the X-axis effect size comes from the Christophersen, et al, 2017 atrial fibrillation

436 GWAS<sup>10</sup>, while the Y-axis effect size comes from the LAmin volume GWAS in this manuscript.

437 Points represent the mean effect estimates, with 95% confidence intervals for the mean.

438

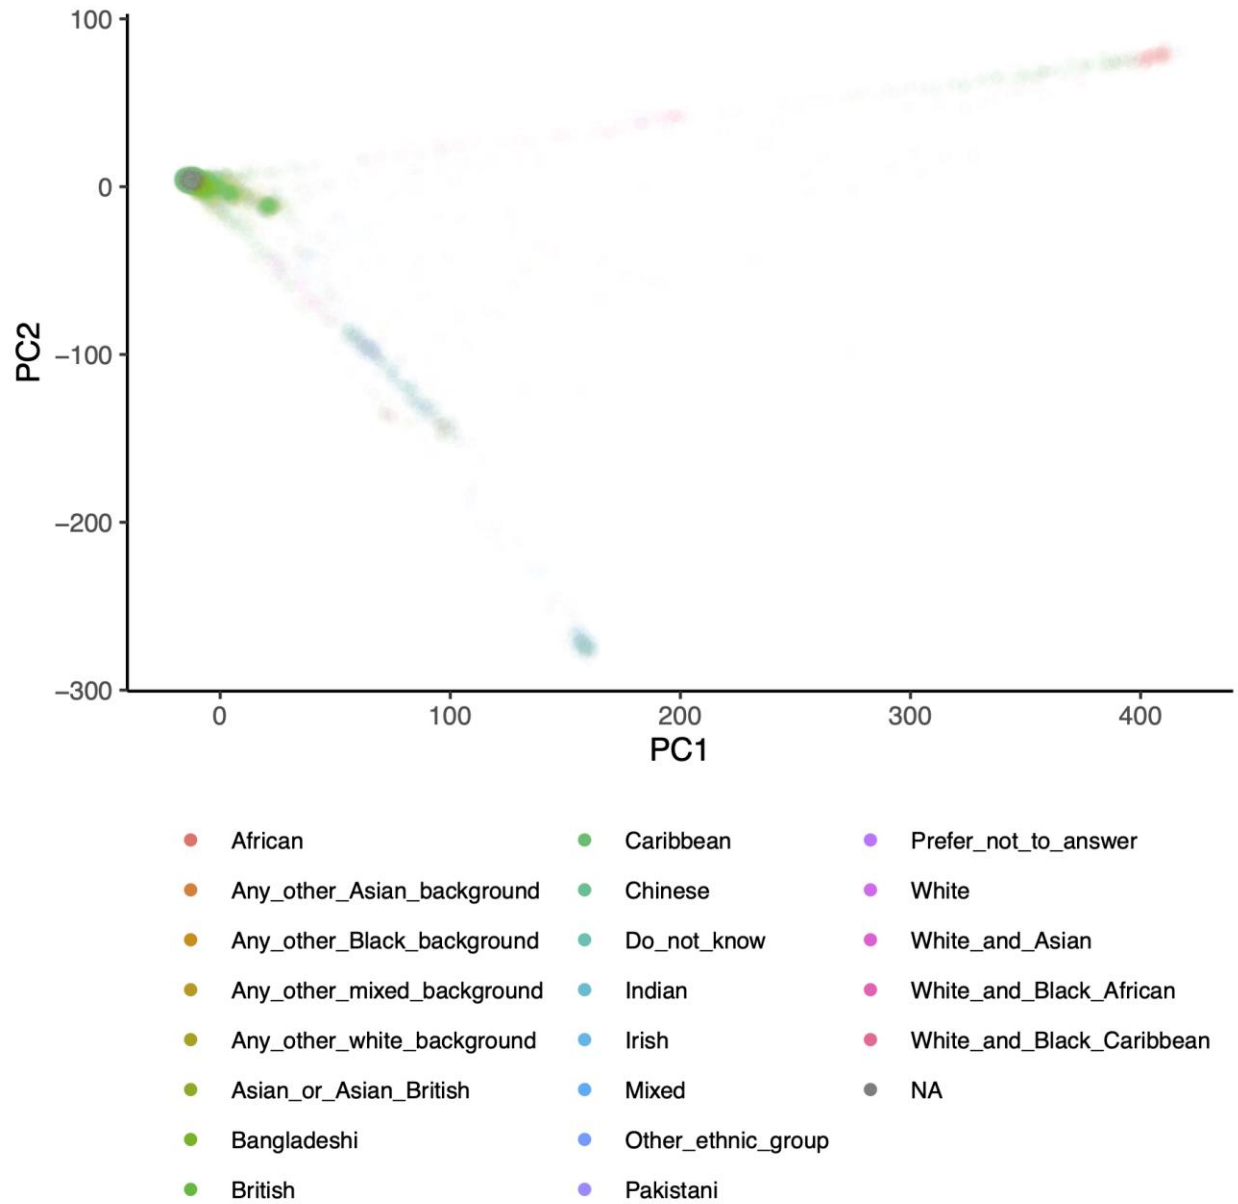

439

440 Supplementary Figure 9 - Principal components of ancestry

441 Principal components of ancestry for the GWAS participants, as well as participants' self-

442 described ethnicity mapped with color.

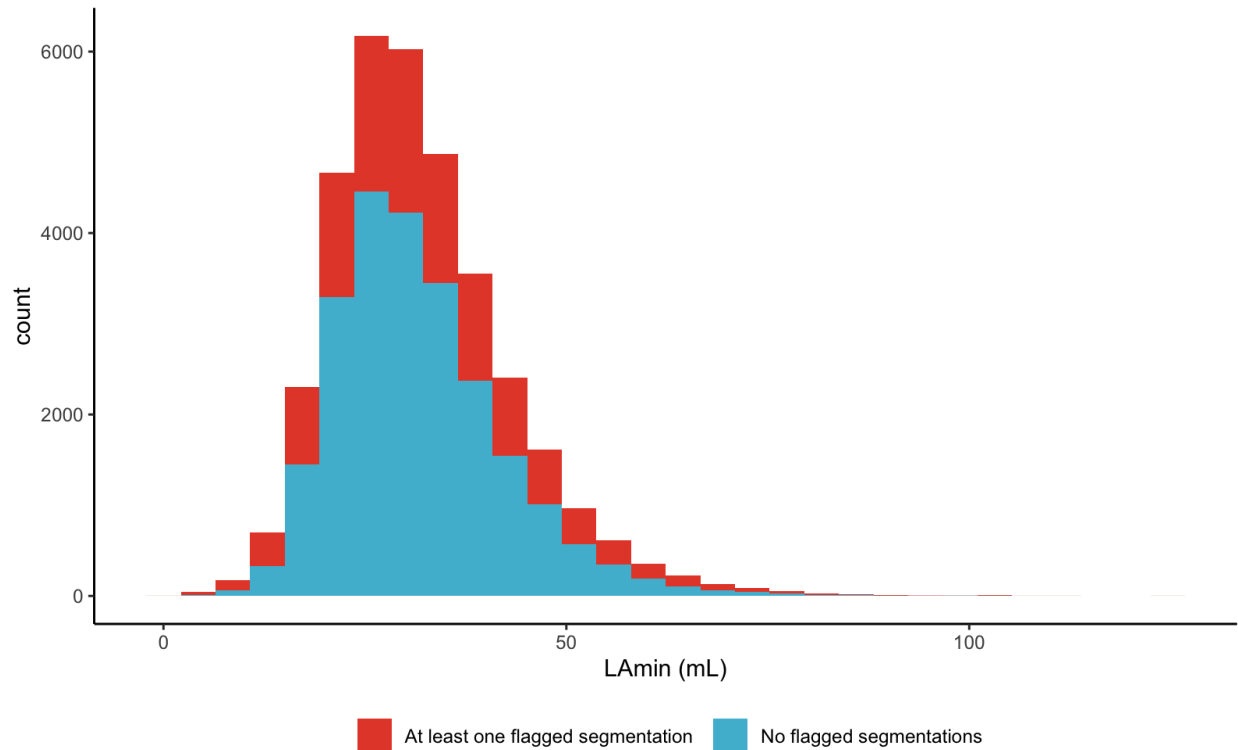

443

444 Supplementary Figure 10 - Atrial volume with or without QC flags

445 Histogram of distribution of LAmin volumes among participants with successful left atrial surface  
 446 reconstruction. Values for those with at least one QC-flagged MRI segmentation series are  
 447 colored in red, while those for participants with no flagged series are colored in turquoise. The  
 448 segmentations are stacked.

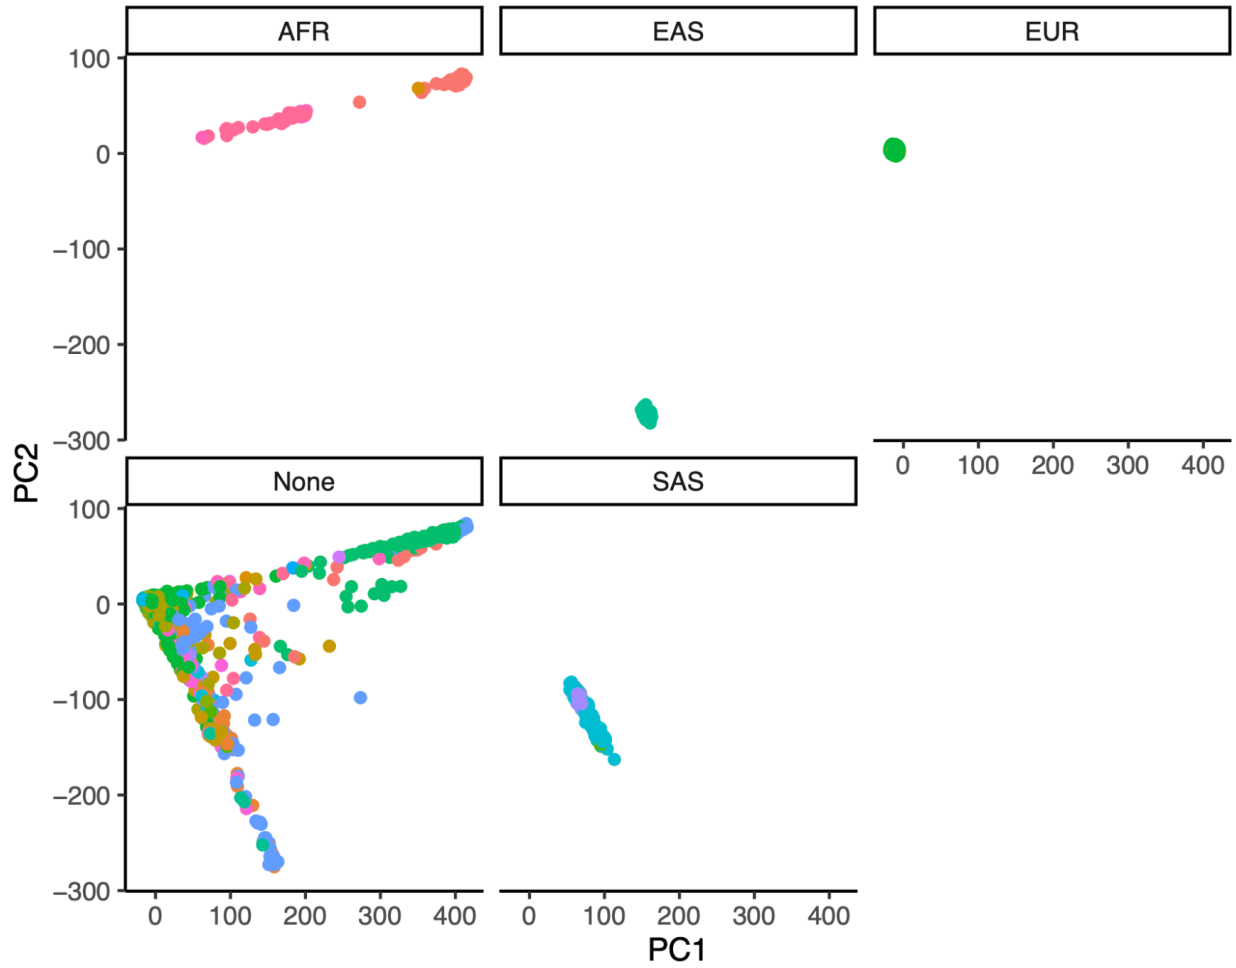

- African
  - Any\_other\_Asian\_background
  - Any\_other\_Black\_background
  - Any\_other\_mixed\_background
  - Any\_other\_white\_background
  - Asian\_or\_Asian\_British
  - Bangladeshi
  - British
- Caribbean
  - Chinese
  - Do\_not\_know
  - Indian
  - Irish
  - Mixed
  - Other\_ethnic\_group
  - Pakistani
- Prefer\_not\_to\_answer
  - White
  - White\_and\_Asian
  - White\_and\_Black\_African
  - White\_and\_Black\_Caribbean
  - NA

450 Supplementary Figure 11 - Principal components of ancestry by inlier group  
451 Principal components of ancestry for the GWAS participants, as well as participants' self-  
452 described ethnicity mapped with color. Each genetic inlier group is split into its own facet. The  
453 participants that were not part of any genetic inlier group are labeled "None".  
454

## 455 Supplementary References

- 456 1. Petersen, S. E. *et al.* UK Biobank's cardiovascular magnetic resonance protocol. *J*  
457 *Cardiovasc Magn Reson* **18**, (2016).
- 458 2. Petersen, S. E. *et al.* Reference ranges for cardiac structure and function using  
459 cardiovascular magnetic resonance (CMR) in Caucasians from the UK Biobank population  
460 cohort. *Journal of Cardiovascular Magnetic Resonance* **19**, 18 (2017).
- 461 3. Aschard, H., Vilhjálmsón, B. J., Joshi, A. D., Price, A. L. & Kraft, P. Adjusting for Heritable  
462 Covariates Can Bias Effect Estimates in Genome-Wide Association Studies. *Am J Hum*  
463 *Genet* **96**, 329–339 (2015).
- 464 4. Bellenguez, C. *et al.* A robust clustering algorithm for identifying problematic samples in  
465 genome-wide association studies. *Bioinformatics* **28**, 134–135 (2012).
- 466 5. Bycroft, C. *et al.* The UK Biobank resource with deep phenotyping and genomic data.  
467 *Nature* **562**, 203 (2018).
- 468 6. Mbatchou, J. *et al.* Computationally efficient whole-genome regression for quantitative and  
469 binary traits. *Nat Genet* **53**, 1097–1103 (2021).
- 470 7. Willer, C. J., Li, Y. & Abecasis, G. R. METAL: fast and efficient meta-analysis of  
471 genomewide association scans. *Bioinformatics* **26**, 2190–2191 (2010).
- 472 8. Sanfilippo, A. J. *et al.* Atrial enlargement as a consequence of atrial fibrillation. A  
473 prospective echocardiographic study. *Circulation* **82**, 792–797 (1990).
- 474 9. Sardana Mayank *et al.* Association of Left Atrial Function Index with Atrial Fibrillation and  
475 Cardiovascular Disease: The Framingham Offspring Study. *Journal of the American Heart*  
476 *Association* **7**, e008435 (2018).
- 477 10. Christophersen, I. E. *et al.* Large-scale analyses of common and rare variants identify 12  
478 new loci associated with atrial fibrillation. *Nat Genet* **49**, 946–952 (2017).
- 479





## 481 FinnGen Consortium

482 Aarno Palotie<sup>8,19,20</sup>, Mark Daly<sup>21</sup>, Bridget Riley-Gills<sup>22</sup>, Howard Jacob<sup>22</sup>, Dirk Paul<sup>23</sup>, Athena  
483 Matakidou<sup>23</sup>, Adam Platt<sup>23</sup>, Heiko Runz<sup>24</sup>, Sally John<sup>24</sup>, George Okafo<sup>25</sup>, Nathan Lawless<sup>25</sup>, Heli  
484 Salminen-Mankonen<sup>25</sup>, Robert Plenge<sup>26</sup>, Joseph Maranville<sup>26</sup>, Mark McCarthy<sup>27</sup>, Julie  
485 Hunkapiller<sup>27</sup>, Margaret G. Ehm<sup>28</sup>, Kirsi Auro<sup>29</sup>, Simonne Longrich<sup>30</sup>, Caroline Fox<sup>30</sup>, Anders  
486 Mälarstig<sup>31</sup>, Katherine Klinger<sup>32</sup>, Deepak Raipal<sup>32</sup>, Eric Green<sup>33</sup>, Robert Graham<sup>33</sup>, Robert  
487 Yang<sup>34</sup>, Chris O'Donnell<sup>35</sup>, Tomi P. Mäkelä<sup>36</sup>, Jaakko Kaprio<sup>37</sup>, Petri Virolainen<sup>38</sup>, Antti  
488 Hakanen<sup>38</sup>, Terhi Kilpi<sup>39</sup>, Markus Perola<sup>39</sup>, Jukka Partanen<sup>40</sup>, Anne Pitkäranta<sup>41</sup>, Taneli Raivio<sup>41</sup>,  
489 Raisa Serpi<sup>42</sup>, Tarja Laitinen<sup>43</sup>, Veli-Matti Kosma<sup>44</sup>, Jari Laukkanen<sup>45</sup>, Marco Hautalahti<sup>46</sup>, Outi  
490 Tuovila<sup>47</sup>, Raimo Pakkanen<sup>47</sup>, Jeffrey Waring<sup>22</sup>, Bridget Riley-Gillis<sup>22</sup>, Fedik Rahimov<sup>22</sup>, Ioanna  
491 Tachmazidou<sup>23</sup>, Chia-Yen Chen<sup>24</sup>, Heiko Runz<sup>24</sup>, Zhihao Ding<sup>25</sup>, Marc Jung<sup>25</sup>, Shameek  
492 Biswas<sup>26</sup>, Rion Pendergrass<sup>27</sup>, Julie Hunkapiller<sup>27</sup>, Margaret G. Ehm<sup>28</sup>, David Pulford<sup>48</sup>, Neha  
493 Raghavan<sup>30</sup>, Adriana Huertas-Vazquez<sup>30</sup>, Jae-Hoon Sul<sup>30</sup>, Anders Mälarstig<sup>31</sup>, Xinli Hu<sup>31</sup>,  
494 Katherine Klinger<sup>32</sup>, Robert Graham<sup>33</sup>, Eric Green<sup>33</sup>, Sahar Mozaffari<sup>33</sup>, Dawn Waterworth<sup>49</sup>,  
495 Nicole Renaud<sup>35</sup>, Ma'en Obeidat<sup>35</sup>, Samuli Ripatti<sup>37</sup>, Johanna Schleutker<sup>50</sup>, Markus Perola<sup>39</sup>,  
496 Mikko Arvas<sup>40</sup>, Olli Carpén<sup>41</sup>, Reetta Hinttala<sup>42</sup>, Johannes Kettunen<sup>42</sup>, Arto Mannermaa<sup>44</sup>,  
497 Katriina Aalto-Setälä<sup>51</sup>, Mika Kähönen<sup>43</sup>, Jari Laukkanen<sup>45</sup>, Johanna Mäkelä<sup>46</sup>, Reetta  
498 Kälviäinen<sup>52</sup>, Valtteri Julkunen<sup>52</sup>, Hilikka Soinen<sup>52</sup>, Anne Remes<sup>53</sup>, Mikko Hiltunen<sup>54</sup>, Jukka  
499 Peltola<sup>55</sup>, Minna Raivio<sup>56</sup>, Pentti Tienari<sup>56</sup>, Juha Rinne<sup>57</sup>, Roosa Kallionpää<sup>57</sup>, Juulia Partanen<sup>58</sup>,  
500 Ali Abbasi<sup>22</sup>, Adam Ziemann<sup>22</sup>, Nizar Smaoui<sup>22</sup>, Anne Lehtonen<sup>22</sup>, Susan Eaton<sup>24</sup>, Heiko Runz<sup>24</sup>,  
501 Sanni Lahdenperä<sup>24</sup>, Shameek Biswas<sup>26</sup>, Julie Hunkapiller<sup>27</sup>, Natalie Bowers<sup>27</sup>, Edmond Teng<sup>27</sup>,  
502 Rion Pendergrass<sup>27</sup>, Fanli Xu<sup>59</sup>, David Pulford<sup>48</sup>, Kirsi Auro<sup>29</sup>, Laura Addis<sup>59</sup>, John Eicher<sup>59</sup>,  
503 Qingqin S Li<sup>60</sup>, Karen He<sup>49</sup>, Ekaterina Khramtsova<sup>49</sup>, Neha Raghavan<sup>30</sup>, Martti Färkkilä<sup>56</sup>, Jukka  
504 Koskela<sup>56</sup>, Sampsa Pikkarainen<sup>56</sup>, Airi Jussila<sup>55</sup>, Katri Kaukinen<sup>55</sup>, Timo Blomster<sup>53</sup>, Mikko  
505 Kiviniemi<sup>52</sup>, Markku Voutilainen<sup>57</sup>, Mark Daly<sup>61</sup>, Ali Abbasi<sup>22</sup>, Jeffrey Waring<sup>22</sup>, Nizar Smaoui<sup>22</sup>,  
506 Fedik Rahimov<sup>22</sup>, Anne Lehtonen<sup>22</sup>, Tim Lu<sup>27</sup>, Natalie Bowers<sup>27</sup>, Rion Pendergrass<sup>27</sup>, Linda

507 McCarthy<sup>59</sup>, Amy Hart<sup>49</sup>, Meijian Guan<sup>49</sup>, Jason Miller<sup>30</sup>, Kirsi Kalpala<sup>31</sup>, Melissa Miller<sup>31</sup>, Xinli  
508 Hu<sup>31</sup>, Kari Eklund<sup>56</sup>, Antti Palomäki<sup>57</sup>, Pia Isomäki<sup>55</sup>, Laura Pirilä<sup>57</sup>, Oili Kaipainen-Seppänen<sup>52</sup>,  
509 Johanna Huhtakangas<sup>53</sup>, Nina Mars<sup>37</sup>, Ali Abbasi<sup>22</sup>, Jeffrey Waring<sup>22</sup>, Fedik Rahimov<sup>22</sup>, Apinya  
510 Lertratanakul<sup>22</sup>, Nizar Smaoui<sup>22</sup>, Anne Lehtonen<sup>22</sup>, Marla Hochfeld<sup>26</sup>, Natalie Bowers<sup>27</sup>, Rion  
511 Pendergrass<sup>27</sup>, Jorge Esparza Gordillo<sup>59</sup>, Kirsi Auro<sup>29</sup>, Dawn Waterworth<sup>49</sup>, Fabiana Farias<sup>30</sup>,  
512 Kirsi Kalpala<sup>31</sup>, Nan Bing<sup>31</sup>, Xinli Hu<sup>31</sup>, Tarja Laitinen<sup>55</sup>, Margit Pelkonen<sup>52</sup>, Paula Kauppi<sup>56</sup>,  
513 Hannu Kankaanranta<sup>62</sup>, Terttu Harju<sup>53</sup>, Riitta Lahesmaa<sup>57</sup>, Nizar Smaoui<sup>22</sup>, Glenda Lassi<sup>23</sup>,  
514 Susan Eaton<sup>24</sup>, Hubert Chen<sup>27</sup>, Rion Pendergrass<sup>27</sup>, Natalie Bowers<sup>27</sup>, Joanna Betts<sup>59</sup>, Kirsi  
515 Auro<sup>29</sup>, Rajashree Mishra<sup>59</sup>, Majd Mouded<sup>63</sup>, Debby Ngo<sup>63</sup>, Teemu Niiranen<sup>64</sup>, Felix Vaura<sup>64</sup>,  
516 Veikko Salomaa<sup>64</sup>, Kaj Metsärinne<sup>57</sup>, Jenni Aittokallio<sup>57</sup>, Mika Kähönen<sup>55</sup>, Jussi Hernesniemi<sup>55</sup>,  
517 Daniel Gordin<sup>56</sup>, Juha Sinisalo<sup>56</sup>, Marja-Riitta Taskinen<sup>56</sup>, Tiinamaija Tuomi<sup>56</sup>, Timo Hiltunen<sup>56</sup>,  
518 Jari Laukkanen<sup>65</sup>, Amanda Elliott<sup>66</sup>, Mary Pat Reeve<sup>37</sup>, Sanni Ruotsalainen<sup>37</sup>, Benjamin  
519 Challis<sup>23</sup>, Dirk Paul<sup>23</sup>, Julie Hunkapiller<sup>27</sup>, Natalie Bowers<sup>27</sup>, Rion Pendergrass<sup>27</sup>, Audrey Chu<sup>59</sup>,  
520 Kirsi Auro<sup>29</sup>, Dermot Reilly<sup>67</sup>, Mike Mendelson<sup>68</sup>, Jaakko Parkkinen<sup>31</sup>, Melissa Miller<sup>31</sup>, Tuomo  
521 Meretoja<sup>56</sup>, Heikki Joensuu<sup>56</sup>, Olli Carpén<sup>56</sup>, Johanna Mattson<sup>56</sup>, Eveliina Salminen<sup>56</sup>, Annika  
522 Auranen<sup>69</sup>, Peeter Karihtala<sup>53</sup>, Päivi Auvinen<sup>52</sup>, Klaus Elenius<sup>57</sup>, Johanna Schleutker<sup>57</sup>, Esa  
523 Pitkänen<sup>37</sup>, Nina Mars<sup>37</sup>, Mark Daly<sup>21</sup>, Relja Popovic<sup>22</sup>, Jeffrey Waring<sup>22</sup>, Bridget Riley-Gillis<sup>22</sup>,  
524 Anne Lehtonen<sup>22</sup>, Jennifer Schutzman<sup>27</sup>, Julie Hunkapiller<sup>27</sup>, Natalie Bowers<sup>27</sup>, Rion  
525 Pendergrass<sup>27</sup>, Diptee Kulkarni<sup>59</sup>, Kirsi Auro<sup>29</sup>, Alessandro Porello<sup>49</sup>, Andrey Loboda<sup>30</sup>, Heli  
526 Lehtonen<sup>31</sup>, Stefan McDonough<sup>31</sup>, Sauli Vuoti<sup>70</sup>, Kai Kaarniranta<sup>52</sup>, Joni A Turunen<sup>71</sup>, Terhi  
527 Ollila<sup>56</sup>, Hannu Uusitalo<sup>55</sup>, Juha Karjalainen<sup>37</sup>, Esa Pitkänen<sup>37</sup>, Mengzhen Liu<sup>22</sup>, Heiko Runz<sup>24</sup>,  
528 Stephanie Loomis<sup>24</sup>, Erich Strauss<sup>27</sup>, Natalie Bowers<sup>27</sup>, Hao Chen<sup>27</sup>, Rion Pendergrass<sup>27</sup>, Kaisa  
529 Tasanen<sup>53</sup>, Laura Huilaja<sup>53</sup>, Katariina Hannula-Jouppi<sup>56</sup>, Teea Salmi<sup>55</sup>, Sirkku Peltonen<sup>57</sup>, Leena  
530 Koulu<sup>57</sup>, Nizar Smaoui<sup>22</sup>, Fedik Rahimov<sup>22</sup>, Anne Lehtonen<sup>22</sup>, David Choy<sup>27</sup>, Rion Pendergrass<sup>27</sup>,  
531 Dawn Waterworth<sup>49</sup>, Kirsi Kalpala<sup>31</sup>, Ying Wu<sup>31</sup>, Pirkko Pussinen<sup>56</sup>, Aino Salminen<sup>56</sup>, Tuula  
532 Salo<sup>56</sup>, David Rice<sup>56</sup>, Pekka Nieminen<sup>56</sup>, Ulla Palotie<sup>56</sup>, Maria Siponen<sup>52</sup>, Liisa Suominen<sup>52</sup>, Päivi

533 Mäntylä<sup>52</sup>, Ulvi Gursoy<sup>57</sup>, Vuokko Anttonen<sup>53</sup>, Kirsi Sipilä<sup>72</sup>, Rion Pendergrass<sup>27</sup>, Hannele  
534 Laivuori<sup>37</sup>, Venla Kurra<sup>55</sup>, Laura Kotaniemi-Talonen<sup>55</sup>, Oskari Heikinheimo<sup>56</sup>, Ilkka Kalliala<sup>56</sup>,  
535 Lauri Aaltonen<sup>56</sup>, Varpu Jokimaa<sup>57</sup>, Johannes Kettunen<sup>53</sup>, Marja Vääräsmäki<sup>53</sup>, Outi Uimari<sup>53</sup>,  
536 Laure Morin-Papunen<sup>53</sup>, Maarit Niinimäki<sup>53</sup>, Terhi Piltonen<sup>53</sup>, Katja Kivinen<sup>37</sup>, Elisabeth Widen<sup>37</sup>,  
537 Taru Tukiainen<sup>37</sup>, Mary Pat Reeve<sup>37</sup>, Mark Daly<sup>21</sup>, Niko Välimäki<sup>73</sup>, Eija Laakkonen<sup>74</sup>, Jaakko  
538 Tyrmi<sup>75</sup>, Heidi Silven<sup>76</sup>, Eeva Sliz<sup>76</sup>, Riikka Arffman<sup>76</sup>, Susanna Savukoski<sup>76</sup>, Triin Laisk<sup>77</sup>, Natalia  
539 Pujol<sup>77</sup>, Mengzhen Liu<sup>22</sup>, Bridget Riley-Gillis<sup>22</sup>, Rion Pendergrass<sup>27</sup>, Janet Kumar<sup>28</sup>, Kirsi Auro<sup>29</sup>,  
540 Iiris Hovatta<sup>78</sup>, Chia-Yen Chen<sup>24</sup>, Erkki Isometsä<sup>56</sup>, Hanna Ollila<sup>37</sup>, Jaana Suvisaari<sup>64</sup>, Thomas  
541 Damm Als<sup>79</sup>, Antti Mäkitie<sup>80</sup>, Argyro Bizaki-Vallaskangas<sup>55</sup>, Sanna Toppila-Salmi<sup>78</sup>, Tytti  
542 Willberg<sup>57</sup>, Elmo Saarentaus<sup>37</sup>, Antti Aarnisalo<sup>56</sup>, Eveliina Salminen<sup>56</sup>, Elisa Rahikkala<sup>53</sup>,  
543 Johannes Kettunen<sup>53</sup>, Kristiina Aittomäki<sup>81</sup>, Fredrik Åberg<sup>82</sup>, Mitja Kurki<sup>83</sup>, Samuli Ripatti<sup>37</sup>, Mark  
544 Daly<sup>61</sup>, Juha Karjalainen<sup>37</sup>, Aki Havulinna<sup>84</sup>, Juha Mehtonen<sup>37</sup>, Priit Palta<sup>37</sup>, Shabbeer Hassan<sup>37</sup>,  
545 Pietro Della Briotta Parolo<sup>37</sup>, Wei Zhou<sup>85</sup>, Mutaamba Maasha<sup>85</sup>, Shabbeer Hassan<sup>37</sup>, Susanna  
546 Lemmelä<sup>37</sup>, Manuel Rivas<sup>86</sup>, Mari E. Niemi<sup>37</sup>, Aarno Palotie<sup>37</sup>, Aoxing Liu<sup>37</sup>, Arto Lehisto<sup>37</sup>,  
547 Andrea Ganna<sup>37</sup>, Vincent Llorens<sup>37</sup>, Hannele Laivuori<sup>37</sup>, Taru Tukiainen<sup>37</sup>, Mary Pat Reeve<sup>37</sup>,  
548 Henrike Heyne<sup>37</sup>, Nina Mars<sup>37</sup>, Joel Rämö<sup>37</sup>, Elmo Saarentaus<sup>37</sup>, Hanna Ollila<sup>37</sup>, Rodos  
549 Rodosthenous<sup>37</sup>, Satu Strausz<sup>37</sup>, Tuula Palotie<sup>87</sup>, Kimmo Palin<sup>73</sup>, Javier Garcia-Tabuenca<sup>88</sup>,  
550 Harri Siirtola<sup>88</sup>, Tuomo Kiiskinen<sup>37</sup>, Jiwoo Lee<sup>83</sup>, Kristin Tsuo<sup>83</sup>, Amanda Elliott<sup>66</sup>, Kati  
551 Kristiansson<sup>39</sup>, Mikko Arvas<sup>40</sup>, Kati Hyvärinen<sup>89</sup>, Jarmo Ritari<sup>89</sup>, Olli Carpén<sup>41</sup>, Johannes  
552 Kettunen<sup>42</sup>, Katri Pylkäs<sup>76</sup>, Eeva Sliz<sup>76</sup>, Minna Karjalainen<sup>76</sup>, Tuomo Mantere<sup>42</sup>, Eeva  
553 Kangasniemi<sup>43</sup>, Sami Heikkinen<sup>54</sup>, Arto Mannermaa<sup>44</sup>, Eija Laakkonen<sup>74</sup>, Nina Pitkänen<sup>38</sup>,  
554 Samuel Lessard<sup>32</sup>, Clément Chatelain<sup>32</sup>, Perttu Terho<sup>38</sup>, Sirpa Soini<sup>39</sup>, Jukka Partanen<sup>40</sup>, Eero  
555 Punkka<sup>41</sup>, Raisa Serpi<sup>42</sup>, Sanna Siltanen<sup>43</sup>, Veli-Matti Kosma<sup>44</sup>, Teijo Kuopio<sup>45</sup>, Anu Jalanko<sup>37</sup>,  
556 Huei-Yi Shen<sup>37</sup>, Risto Kajanne<sup>37</sup>, Mervi Aavikko<sup>37</sup>, Henna Palin<sup>43</sup>, Malla-Maria Linna<sup>41</sup>, Mitja  
557 Kurki<sup>83</sup>, Juha Karjalainen<sup>37</sup>, Pietro Della Briotta Parolo<sup>37</sup>, Arto Lehisto<sup>37</sup>, Juha Mehtonen<sup>37</sup>, Wei  
558 Zhou<sup>85</sup>, Masahiro Kanai<sup>85</sup>, Mutaamba Maasha<sup>85</sup>, Hannele Laivuori<sup>37</sup>, Aki Havulinna<sup>84</sup>, Susanna

559 Lemmelä<sup>37</sup>, Tuomo Kiiskinen<sup>37</sup>, L. Elisa Lahtela<sup>37</sup>, Mari Kaunisto<sup>37</sup>, Elina Kilpeläinen<sup>37</sup>, Timo P.  
560 Sipilä<sup>37</sup>, Oluwaseun Alexander Dada<sup>37</sup>, Awaisa Ghazal<sup>37</sup>, Anastasia Kytölä<sup>37</sup>, Rigbe  
561 Weldatsadik<sup>37</sup>, Sanni Ruotsalainen<sup>37</sup>, Kati Donner<sup>37</sup>, Timo P. Sipilä<sup>37</sup>, Anu Loukola<sup>41</sup>, Päivi  
562 Laiho<sup>39</sup>, Tuuli Sistonen<sup>39</sup>, Essi Kaiharju<sup>39</sup>, Markku Laukkanen<sup>39</sup>, Elina Järvensivu<sup>39</sup>, Sini  
563 Lähteenmäki<sup>39</sup>, Lotta Männikkö<sup>39</sup>, Regis Wong<sup>39</sup>, Auli Toivola<sup>39</sup>, Minna Brunfeldt<sup>39</sup>, Hannele  
564 Mattsson<sup>39</sup>, Kati Kristiansson<sup>39</sup>, Susanna Lemmelä<sup>37</sup>, Sami Koskelainen<sup>39</sup>, Tero Hiekkalinna<sup>39</sup>,  
565 Teemu Paajanen<sup>39</sup>, Priit Palta<sup>37</sup>, Kalle Pärn<sup>37</sup>, Mart Kals<sup>37</sup>, Shuang Luo<sup>37</sup>, Tarja Laitinen<sup>55</sup>, Mary  
566 Pat Reeve<sup>37</sup>, Shanmukha Sampath Padmanabhuni<sup>37</sup>, Marianna Niemi<sup>88</sup>, Harri Siirtola<sup>88</sup>, Javier  
567 Gracia-Tabuenca<sup>88</sup>, Mika Helminen<sup>88</sup>, Tiina Luukkaala<sup>88</sup>, Iida Vähätalo<sup>88</sup>, Jyrki Pitkänen<sup>37</sup>, Marco  
568 Hautalahti<sup>90</sup>, Johanna Mäkelä<sup>90</sup>, Sarah Smith<sup>90</sup>, Tom Southerington<sup>90</sup>  
569  
570 8 Institute for Molecular Medicine Finland (FIMM), Helsinki Institute of Life Science (HiLIFE),  
571 University of Helsinki  
572 19 Analytic and Translational Genetics Unit, Massachusetts General Hospital and Harvard  
573 Medical School  
574 20 Stanley Center for Psychiatric Research, Broad Institute of MIT and Harvard  
575 21 Institute for Molecular Medicine Finland (FIMM), HiLIFE, University of Helsinki, Helsinki,  
576 Finland; Broad Institute of MIT and Harvard; Massachusetts General Hospital  
577 22 Abbvie, Chicago, IL, United States  
578 23 Astra Zeneca, Cambridge, United Kingdom  
579 24 Biogen, Cambridge, MA, United States  
580 25 Boehringer Ingelheim, Ingelheim am Rhein, Germany  
581 26 Bristol Myers Squibb, New York, NY, United States  
582 27 Genentech, San Francisco, CA, United States  
583 28 GlaxoSmithKline, Collegeville, PA, United States  
584 29 GlaxoSmithKline, Espoo, Finland

585 30 Merck, Kenilworth, NJ, United States  
586 31 Pfizer, New York, NY, United States  
587 32 Translational Sciences, Sanofi R&D, Framingham, MA, USA  
588 33 Maze Therapeutics, San Francisco, CA, United States  
589 34 Janssen Biotech, Beerse, Belgium  
590 35 Novartis Institutes for BioMedical Research, Cambridge, MA, United States  
591 36 HiLIFE, University of Helsinki, Finland, Finland  
592 37 Institute for Molecular Medicine Finland (FIMM), HiLIFE, University of Helsinki, Helsinki,  
593 Finland  
594 38 Auria Biobank / University of Turku / Hospital District of Southwest Finland, Turku, Finland  
595 39 THL Biobank / Finnish Institute for Health and Welfare (THL), Helsinki, Finland  
596 40 Finnish Red Cross Blood Service / Finnish Hematology Registry and Clinical Biobank,  
597 Helsinki, Finland  
598 41 Helsinki Biobank / Helsinki University and Hospital District of Helsinki and Uusimaa, Helsinki  
599 42 Northern Finland Biobank Borealis / University of Oulu / Northern Ostrobothnia Hospital  
600 District, Oulu, Finland  
601 43 Finnish Clinical Biobank Tampere / University of Tampere / Pirkanmaa Hospital District,  
602 Tampere, Finland  
603 44 Biobank of Eastern Finland / University of Eastern Finland / Northern Savo Hospital District,  
604 Kuopio, Finland  
605 45 Central Finland Biobank / University of Jyväskylä / Central Finland Health Care District,  
606 Jyväskylä, Finland  
607 46 FINBB - Finnish biobank cooperative  
608 47 Business Finland, Helsinki, Finland  
609 48 GlaxoSmithKline, Stevenage, United Kingdom  
610 49 Janssen Research & Development, LLC, Spring House, PA, United States

611 50 Auria Biobank / Univ. of Turku / Hospital District of Southwest Finland, Turku, Finland  
612 51 Faculty of Medicine and Health Technology, Tampere University, Tampere, Finland  
613 52 Northern Savo Hospital District, Kuopio, Finland  
614 53 Northern Ostrobothnia Hospital District, Oulu, Finland  
615 54 University of Eastern Finland, Kuopio, Finland  
616 55 Pirkanmaa Hospital District, Tampere, Finland  
617 56 Hospital District of Helsinki and Uusimaa, Helsinki, Finland  
618 57 Hospital District of Southwest Finland, Turku, Finland  
619 58 Institute for Molecular Medicine Finland, HiLIFE, University of Helsinki, Finland  
620 59 GlaxoSmithKline, Brentford, United Kingdom  
621 60 Janssen Research & Development, LLC, Titusville, NJ 08560, United States  
622 61 Institute for Molecular Medicine, Finland (FIMM), HiLIFE, University of Helsinki, Helsinki,  
623 Finland; Broad Institute of MIT and Harvard; Massachusetts General Hospital  
624 62 University of Gothenburg, Gothenburg, Sweden/ Seinäjoki Central Hospital, Seinäjoki,  
625 Finland/ Tampere University, Tampere, Finland  
626 63 Novartis, Basel, Switzerland  
627 64 Finnish Institute for Health and Welfare (THL), Helsinki, Finland  
628 65 Central Finland Health Care District, Jyväskylä, Finland  
629 66 Institute for Molecular Medicine Finland (FIMM), HiLIFE, University of Helsinki, Helsinki,  
630 Finland; Broad Institute, Cambridge, MA, USA and Massachusetts General Hospital, Boston,  
631 MA, USA  
632 67 Janssen Research & Development, LLC, Boston, MA, United States  
633 68 Novartis, Boston, MA, United States  
634 69 Pirkanmaa Hospital District , Tampere, Finland  
635 70 Janssen-Cilag Oy, Espoo, Finland  
636 71 Helsinki University Hospital and University of Helsinki, Helsinki, Finland; Eye Genetics

- 637 Group, Folkhälsan Research Center, Helsinki, Finland
- 638 72 Research Unit of Oral Health Sciences Faculty of Medicine, University of Oulu, Oulu,  
639 Finland; Medical Research Center, Oulu, Oulu University Hospital and University of Oulu, Oulu,  
640 Finland
- 641 73 University of Helsinki, Helsinki, Finland
- 642 74 University of Jyväskylä, Jyväskylä, Finland
- 643 75 University of Oulu, Oulu, Finland / University of Tampere, Tampere, Finland
- 644 76 University of Oulu, Oulu, Finland
- 645 77 Estonian biobank, Tartu, Estonia
- 646 78 University of Helsinki, Finland
- 647 79 Aarhus University, Denmark
- 648 80 Department of Otorhinolaryngology - Head and Neck Surgery, University of Helsinki and  
649 Helsinki University Hospital, Helsinki, Finland
- 650 81 Department of Medical Genetics, Helsinki University Central Hospital, Helsinki, Finland
- 651 82 Transplantation and Liver Surgery Clinic, Helsinki University Hospital, Helsinki University,  
652 Helsinki, Finland
- 653 83 Institute for Molecular Medicine Finland (FIMM), HiLIFE, University of Helsinki, Helsinki,  
654 Finland; Broad Institute, Cambridge, MA, United States
- 655 84 Institute for Molecular Medicine Finland (FIMM), HiLIFE, University of Helsinki, Helsinki,  
656 Finland; Finnish Institute for Health and Welfare (THL), Helsinki, Finland
- 657 85 Broad Institute, Cambridge, MA, United States
- 658 86 University of Stanford, Stanford, CA, United States
- 659 87 University of Helsinki and Hospital District of Helsinki and Uusimaa, Helsinki, Finland
- 660 88 University of Tampere, Tampere, Finland
- 661 89 Finnish Red Cross Blood Service, Helsinki, Finland
- 662 90 Finnish Biobank Cooperative - FINBB
